# Supplementary material for: The role of hypoxic-inducible factor (HIF1α) and aldolaseC protein in endometrial carcinogenesis: a retrospective study of 279 patients
Source: PubMed Central journal article supplement — BMJ Open. 2012 Aug 24;2(4):e001450. doi: 10.1136/bmjopen-2012-001450 (PMC3432840; doi:10.1136/bmjopen-2012-001450), 2012-08-24
Supplement: bmjopen-2012-001450.draft_revisions.pdf [file bmjopen-2012-001450.draft_revisions.pdf]

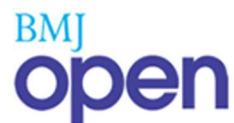

## Hypoxic-inducible Factor (HIF1 $\alpha$ ) and Aldolase C Protein Immunoexpression in Endometrial Cancer

|                                    |                                                                                                                                                                                                                                                      |
|------------------------------------|------------------------------------------------------------------------------------------------------------------------------------------------------------------------------------------------------------------------------------------------------|
| Journal:                           | <i>BMJ Open</i>                                                                                                                                                                                                                                      |
| Manuscript ID:                     | bmjopen-2012-001450                                                                                                                                                                                                                                  |
| Article Type:                      | Research                                                                                                                                                                                                                                             |
| Date Submitted by the Author:      | 09-May-2012                                                                                                                                                                                                                                          |
| Complete List of Authors:          | mhawech-fauceglia, paulette; usc,<br>wang, dan; RPCI,<br>samrao, damanzoopinder; USC,<br>Menesses, Teodulo; USC,<br>Godoy, heidi; RPCI,<br>ough, faith; USC,<br>Lele, shahikant; RPCI,<br>liu, song; RPCI,<br>pejovic, tanja; oregon health science, |
| <b>Primary Subject<br>Heading</b>: | Pathology                                                                                                                                                                                                                                            |
| Secondary Subject Heading:         | Pathology, Reproductive medicine, obstetrics and gynaecology                                                                                                                                                                                         |
| Keywords:                          | Pathology < BASIC SCIENCES, GYNAECOLOGY, Gynaecological oncology < GYNAECOLOGY                                                                                                                                                                       |
|                                    |                                                                                                                                                                                                                                                      |

SCHOLARONE™  
Manuscripts

only

1  
2  
3 **Hypoxic-inducible Factor (HIF1 $\alpha$ ) and Aldolase C Protein Immunoexpression in**  
4  
5 **Endometrial Cancer**  
6  
7  
8  
9  
10

11  
12 **Paulette Mhaweck-Fauceglia<sup>1</sup>, Dan Wang<sup>2</sup>, Damanzoopinder Samrao<sup>1</sup>, Teodulo**  
13 **Menesses<sup>1</sup>, Heidi Godoy<sup>3</sup>, Faith Ough<sup>1</sup>, Shashikant Iele<sup>3</sup>, Song Liu<sup>2</sup>, Tanja Pejovic<sup>4</sup>**  
14  
15  
16  
17  
18  
19  
20  
21

22 <sup>1</sup> Department of Pathology at University of Southern California, Los Angeles-CA  
23

24 <sup>2</sup>Department of Biostatistics, <sup>3</sup>Department of Gynecologic Oncology at Roswell Park  
25

26 Cancer Institute, Buffalo NY, <sup>4</sup>Division of Gynecologic Oncology at Oregon Health &  
27  
28 Science University and the Knight Cancer Institute, Portland, Oregon  
29  
30  
31  
32  
33  
34  
35  
36  
37  
38  
39  
40  
41  
42

43 **Corresponding Author:**

44 Paulette Mhaweck-Fauceglia, MD  
45 Department of Pathology  
46 University of Southern California  
47 1200 N. State Street. Room 7A116  
48 Los Angeles, California 90033-5000  
49 E-mail: pfauceglia@hotmail.com  
50  
51  
52  
53  
54  
55  
56  
57  
58  
59  
60

**Abstract:**

**Objectives:** Hypoxia-inducible factor (HIF1 $\alpha$ ) plays an integral role in response to hypoxia, controlling dozens of target genes including aldolaseC (ALDC), an important enzyme in the glycolytic pathway. It also induces angiogenesis, allowing survival and proliferation of cancer cells. Thus, inhibition of HIF1 $\alpha$  may be an attractive therapeutic option. The aims of our study were to (1) evaluate the expressions of HIF1 $\alpha$  and ALDC in patients with endometrial cancer (EC) and define their association with disease outcome and (2) determine the existence of an association between HIF1 $\alpha$  and ALDC proteins. **Design:** We performed immunohistochemistry using antibodies to ALDC and HIF1 $\alpha$  on paraffin-embedded tissue from 279 patients. The association of ALDC and HIF1 $\alpha$  immunoexpression was evaluated, as well as the association of their expressions with the following clinical parameters; age, histologic subtype, myometrial depth of invasion, lymphovascular invasion, FIGO grade, lymph nodes status, and disease status. **Results:** ALDC and HIF1 $\alpha$  were overexpressed in the vast majority of EC cases (78% and 76% respectively). There was a strong positive association between HIF1 $\alpha$  and ALDC (p=0.0017). There was a significant association between ALDC and depth of myometrial invasion (p=0.0438), and between HIF1 $\alpha$  and tumor grade (p= 0.0231) and tumor subtype (p=0.018). However, there was no association between either ALDC nor HIF1 $\alpha$  and disease status. **Conclusions:** ALDC and HIF1 $\alpha$  play an important role in endometrial carcinogenesis. Their expression by the majority of EC makes inhibition of HIF1 $\alpha$  a very attractive therapeutic option for treating patients with EC.

1  
2  
3 **Key words:** HIF1 $\alpha$ ; AldolaseC; Immunohistochemistry; Endometrial cancer; Disease  
4  
5  
6 outcome.

7  
8  
9  
10 **Subject headings:** HIF1 $\alpha$  and aldolaseC in endometrial cancer  
11  
12

13  
14  
15 **Article Summary:**

16  
17 1- Article focus:

- 18  
19  
20
  - HIF1  $\alpha$  and aldolase C expressions in patients with endometrial cancer
  - HIF1  $\alpha$  and aldolase C interaction in vivo in endometrial cancer.
  - HIF1  $\alpha$  and aldolaseC value in predicting disease outcome in patients with  
27 endometrial cancer.

28  
29 2- Key messages:

- 30  
31  
32
  - HIF1  $\alpha$  and aldolase C are frequently expressed in endometrial cancer.
  - There is strong association between HIF1  $\alpha$  and aldolase C in endometrial cancer  
36 and therefore they could play an important role in its pathogenesis.
  - HIF1  $\alpha$  and aldolase C are associated with poor prognostic factors.
  - HIF1  $\alpha$  and aldolase C are not independent predictive biomarkers of poor  
44 outcome.

45  
46 3- Strengths:

- 47  
48
  - It is a large study of 279 patients.
  - It is one of the few in the literature.

49  
50  
51  
52  
53  
54  
55  
56 3  
57  
58  
59  
60

- 1  
2  
3  
4  
5  
6  
7
- It is the first to evaluate the association of HIF1  $\alpha$  and aldolase C in vivo in endometrial cancer.

8  
9

Limitations:

- 10  
11  
12  
13  
14  
15  
16  
17  
18  
19  
20  
21  
22  
23  
24  
25  
26  
27  
28  
29  
30  
31  
32  
33  
34  
35  
36  
37  
38  
39  
40  
41  
42  
43  
44  
45  
46  
47  
48  
49  
50  
51  
52  
53  
54
- The study did not have a large numbers of type II cancers (serous and clear cell carcinomas).
  - The study did not contain too many cases of late stage tumors (stage III and IV).

**Study approval:**

This study was approved by the IRB committee and was conducted with maintenance of respect to privacy of all patients throughout.

**Funding statement:**

We, the authors, declare that there was no funding for this study.

**Competing interests:**

We, the authors, declare that there is no competing interest with this study.

**Contribution statement:**

PMF: designed and wrote the study

DW, SL: performed the statistical analysis

DS, HG, TM: reviewed the patients charts

DS, FO: helped in reviewing the manuscript.

SL (Shashikant Lele), TP: mentored and were consulted in designing, conducting and writing the study

**Introduction:**

Endometrial cancer (EC) is the most common gynecologic malignancy in developed countries. There are approximately 42,000 cases diagnosed annually in the United States, resulting in almost 8,000 deaths, [1]. EC has been classified into two types based on morphology, pathogenesis, behavior and treatment: type I (endometrioid and mucinous carcinomas), and type II (serous and clear cell carcinomas). Type I is usually low-grade and low stage at initial presentation. Type II is usually high grade and advanced stage at initial presentation. The most reliable prognostic factors in predicting disease outcome in EC are tumor grade, tumor stage, tumor subtype, depth of myometrial invasion, and lymph node involvement, [2-4].

One of the most prominent metabolic alterations in cancer cells is an increase in aerobic glycolysis, known as the Warburg effect after its discovery by Otto Warburg in 1920, [5]. This increase in glycolysis, due to a shift in glucose metabolism from oxidative phosphorylation into the aerobic glycolysis pathway, provides the tumor with metabolic and survival advantages, [6-8]. Aldolase, a critical enzyme in the glycolytic pathway, catalyses the reversible conversion of fructose-1,6-biphosphate to glyceraldehyde-3-phosphate and dihydroxyacetone phosphate. Aldolase has three distinct isoenzymes, A, B, and C, which are similar in sequence with 78% identity between A and C and 68% identity between B and C, [9,10]. Originally identified in brain tissue, aldolaseC (ALDC) has been seen to be overexpressed in carcinomas of the lung, kidney, cervix and endometrium, [11-13].

6

1  
2  
3 The Hypoxic-inducible factor (HIF1) gene codes for two subunits,  $\alpha$  and  $\beta$ , and is  
4 usually activated by hypoxic conditions, a microenvironment that commonly  
5  
6  
7  
8  
9  
10  
11  
12  
13  
14  
15  
16  
17  
18  
19  
20  
21  
22  
23  
24  
25  
26  
27  
28  
29  
30  
31  
32  
33  
34  
35  
36  
37  
38  
39  
40  
41  
42  
43  
44  
45  
46  
47  
48  
49  
50  
51  
52  
53  
54  
55  
56  
57  
58  
59  
60

The Hypoxic-inducible factor (HIF1) gene codes for two subunits,  $\alpha$  and  $\beta$ , and is usually activated by hypoxic conditions, a microenvironment that commonly accompanies cancerous tumors. When activated, HIF1 can interact with enzymes and other transcription factors in order to control vascularization and tissue growth. HIF1 $\alpha$  was recently identified as a potent regulator of ALDC, another mechanism by which it may promote carcinogenesis, [14]. Thus, attempts to target the HIF1 $\alpha$  pathway in hopes of suppressing cancer cell proliferation and progression are underway. In the gynecologic tract, HIF1 $\alpha$  expression increases as the endometrium undergoes changes from normal to premalignant to endometrioid adenocarcinoma. This is paralleled by increased angiogenesis in the endometrium suggesting that HIF1 $\alpha$  might be a key regulator in endometrial carcinogenesis, [15].

Though the interaction between HIF1 $\alpha$  and ALDC has been seen in vivo, their interaction in human samples and in endometrial carcinoma has not yet been described. Therefore, the aims of this study are (1) to evaluate the expression of HIF1 $\alpha$  and ALDC proteins in patients with endometrial cancer and to find an association between these two proteins in this patient sample and 2- to determine whether either of these two proteins independently or any combination of their expressions might have an impact on disease outcome.



## Materials and Methods:

**Patient population:** After obtaining IRB approval, the pathology archives were searched for endometrial carcinoma cases from January 2000-December 2010. Data was extracted from clinical charts including patients' age at the time of diagnosis, surgical stage, post-operative therapy, site of recurrence, and cause and time of death. All patients underwent surgical staging with a total hysterectomy and bilateral salpingo-oophorectomy (TAH+BSO), and pelvic washings. Pelvic and para-aortic lymphadenectomy was performed for patients with advanced stage disease and high grade tumors. Patients were treated according to the National Comprehensive Cancer Network (NCCN) guidelines ([www.cancer.gov](http://www.cancer.gov)).

**Histological evaluation:** Tumor grade was assessed using the International Federation of Gynecology and Obstetrics (FIGO) system and by nuclear grading. FIGO grading was determined as follows; tumors with <5% solid areas were grade 1 (G1), tumors with 5%-50% solid areas were grade 2 (G2) and tumors with > 50% solid areas were grade 3 (G3). Tumors nuclear grade was determined by the variation in nuclear size and shape, chromatin distribution and size of the nucleoli. Tumor stage was assigned based on 1988 FIGO surgical staging guidelines (FIGO, 1989). [16]. All slides were examined by an expert gynecologic pathologist for confirmation of the histologic type, tumor size, tumor grade, depth of myometrial invasion (MI) and presence of lymphovascular invasion (LVI).

**Immunohistochemistry:** Four  $\mu\text{m}$  thick sections from 279 cases were deparaffinized with xylene and washed with ethanol. In addition, 5 sections from normal endometrium

1  
2  
3 were also included in the study. Sections were cooled for 20 minutes and incubated for 10  
4  
5 minutes with 3% H<sub>2</sub>O<sub>2</sub> to quench endogenous peroxidase activity. Blocking was  
6  
7 performed using a serum-free protein block, Dakocytomation (Carpenteria, CA), for 30  
8  
9 minutes. The sections were pretreated with an EDTA buffer saline solution, steamed for  
10  
11 20 minutes and then sections were incubated with HIF1 $\alpha$  (monoclonal; 1:1000 dilution;  
12  
13 Novus Biologicals, Littleton, CO-USA) and aldolaseC (monoclonal; 1:250 dilution;  
14  
15 Sigma-Aldrich, St. Louis, MO) for 1 hour at room temperature. The diaminobenzidine  
16  
17 complex was used as a chromogen. Negative control slides omitting the primary antibody  
18  
19 were included in all assays. The extent of immunochemical reactivity was graded based  
20  
21 on intensity as follows: 0 (negative), 1+ (weak), 2+ (moderate), 3+ (strong). For the sake  
22  
23 of statistical analysis, negative and weak stains were grouped as group I (negative) and  
24  
25 moderate and strong as group II (positive).  
26  
27  
28  
29  
30

31 **Statistical Analyses:** The clinical parameters used for modeling were age, tumor size,  
32  
33 histologic subtype, tumor stage, myometrial depth of invasion, LVI, FIGO grade, nuclear  
34  
35 grade, lymph node status, recurrence, recurrence time, survival time and status. To test  
36  
37 the association between aldolaseC/HIF1 $\alpha$  IHC (positive and negative) and the clinical  
38  
39 parameters, Fisher's exact test was performed for categorical parameters and the logistic  
40  
41 regression model was used for continuous ones. Pearson correlation was used to check  
42  
43 the association of IHC between aldolaseC and HIF1 $\alpha$ . All statistical analysis was  
44  
45 performed using the statistical software package R (<http://www.r-project.org/>).  
46  
47  
48  
49  
50  
51  
52  
53  
54  
55  
56  
57  
58  
59  
60

**Results:****Clinical and pathological features:**

279 patients diagnosed with endometrial carcinoma were included in the study.

The age ranged from 29 to 97 years (median age 65 years). The follow-up period ranged from 0 (as one patient was lost for follow-up) to 137.16 months (median 46.32 months).

The clinical and histological features are summarized in Table 1.

| <b>Table 1. Clinical and pathologic features of patients (data in parentheses are percentages).</b> |                     |            |
|-----------------------------------------------------------------------------------------------------|---------------------|------------|
| <b>Characteristics</b>                                                                              |                     |            |
| <b>No. of evaluable patients</b>                                                                    |                     | 279        |
| <b>Age, year</b>                                                                                    |                     |            |
|                                                                                                     | <b>Median</b>       | 65         |
|                                                                                                     | <b>Range</b>        | 29-97      |
| <b>Follow time, months</b>                                                                          |                     |            |
|                                                                                                     | <b>Median</b>       | 46.32      |
|                                                                                                     | <b>Range</b>        | (0-137.16) |
| <b>Stage</b>                                                                                        |                     |            |
|                                                                                                     | I                   | 181(64.87) |
|                                                                                                     | II                  | 35(12.54)  |
|                                                                                                     | III                 | 43(15.41)  |
|                                                                                                     | IV                  | 20(7.17)   |
| <b>Subtype</b>                                                                                      |                     |            |
|                                                                                                     | <b>Endometrioid</b> | 202(72.4)  |
|                                                                                                     | <b>CCC+serous</b>   | 77(27.6)   |
| <b>Grade(FIGO)</b>                                                                                  |                     |            |
|                                                                                                     | 1                   | 119(42.65) |
|                                                                                                     | 2                   | 53(19)     |
|                                                                                                     | 3                   | 107(38.35) |
| <b>Grade(Nuclear)</b>                                                                               |                     |            |
|                                                                                                     | 1                   | 93(33.33)  |
|                                                                                                     | 2                   | 75(26.88)  |
|                                                                                                     | 3                   | 111(39.78) |
| <b>Tumor size, cm</b>                                                                               |                     |            |
|                                                                                                     | <=2                 | 62(22)     |
|                                                                                                     | >2                  | 217(78)    |
| <b>Depth of invasion</b>                                                                            |                     |            |
|                                                                                                     | <b>Median</b>       | 28         |
|                                                                                                     | <b>Range</b>        | 0-100      |
| <b>LVI</b>                                                                                          |                     |            |
|                                                                                                     | <b>N</b>            | 202(72.4)  |

10

|                   |                                          |            |
|-------------------|------------------------------------------|------------|
|                   | Y                                        | 77(27.6)   |
| Lymph node status | Positive                                 | 50(17.92)  |
|                   | Negative                                 | 135(48.39) |
|                   | Unknown                                  | 94(33.69)  |
| Recurrence        | N                                        | 215(77.06) |
|                   | Y                                        | 47(16.85)  |
|                   | Persistent                               | 12(4.3)    |
|                   | Progression                              | 4(1.43)    |
|                   | Unknown                                  | 1(0.36)    |
| Status            | Alive with no evidence of disease (ANED) | 188(67.38) |
|                   | Alive with evidence of disease (AWED)    | 22(7.89)   |
|                   | Dead of disease (DOD)                    | 38(13.62)  |
|                   | Dead with no evidence of disease (DNED)  | 22(7.89)   |
|                   | dead unknown cause                       | 1(0.36)    |
|                   | Dead with evidence of disease(DWED)      | 7(2.51)    |
|                   | lost for FU                              | 1(0.36)    |

#### AldolaseC and HIF1 $\alpha$ immunoexpressions:

The stain intensity was diffuse and homogenous throughout the tumor. The staining patterns were nuclear for HIF1 $\alpha$  and cytoplasmic for ALDC. The 5 cases of normal endometrium all came from patients who underwent a hysterectomy for benign reasons, such as fibroids, and were weakly positive for ALDC and negative for HIF1 $\alpha$  (**Fig 1A, 1B**). There was a strong positive association between ALDC and HIF1 $\alpha$  proteins ( $p=0.0017$ ) in endometrial cancer. The results of the association of ALDC and the clinical-pathological variables are shown in **Table 2**. 59/279 (22%) of cases were negative for ALDC protein and 220/279 (78%) were positive (**Fig 2A, 2B**). ALDC was only associated with depth of myometrial invasion ( $p=0.0438$ ), leading to the conclusion that tumors that invade deeper into the myometrium are more likely to overexpress ALDC.

**Table 2. Association of Aldolase IHC with Clinicopathologic Variables.**

| Variables                    | Negative<br>(n = 59) | Positive<br>(n = 220) | P value             |
|------------------------------|----------------------|-----------------------|---------------------|
| Age (median)                 | 69                   | 65                    | 0.4*                |
| Myometrial invasion (median) | 21                   | 31.5                  | <b>0.0438</b>       |
| Stage                        |                      |                       |                     |
| I                            | 41(69.49)            | 140(63.64)            | 0.7656              |
| II                           | 8(13.56)             | 27(12.27)             |                     |
| III                          | 7(11.86)             | 36(16.36)             |                     |
| IV                           | 3(5.08)              | 17(7.73)              |                     |
| Tumor Size                   |                      |                       |                     |
| ≤2 cm                        | 15(25.42)            | 47(21.36)             | 0.4866 <sup>^</sup> |
| >2 cm                        | 44(74.58)            | 173(78.64)            |                     |
| LVI                          |                      |                       |                     |
| N                            | 46(77.97)            | 156(70.91)            | 0.3273              |
| Y                            | 13(22.03)            | 64(29.09)             |                     |
| Grade_FIGO                   |                      |                       |                     |
| 1                            | 24(40.68)            | 95(43.18)             | 0.9266              |
| 2                            | 11(18.64)            | 42(19.09)             |                     |
| 3                            | 24(40.68)            | 83(37.73)             |                     |
| Grade_nuclear                |                      |                       |                     |
| 1                            | 15(25.42)            | 78(35.45)             | 0.3096              |
| 2                            | 19(32.2)             | 56(25.45)             |                     |
| 3                            | 25(42.37)            | 86(39.09)             |                     |
| Lymph node status            |                      |                       |                     |
| Positive                     | 6(16.22)             | 44(29.73)             | 0.1461              |
| Negative                     | 31(83.78)            | 104(70.27)            |                     |
| Subtype                      |                      |                       |                     |
| CCC+Serous                   | 17(28.81)            | 60(27.27)             | 0.87                |
| Endometrioid                 | 42(71.19)            | 160(72.73)            |                     |
| Recurrence                   |                      |                       |                     |
| N                            | 45(81.82)            | 170(82.13)            | 1                   |
| Y                            | 10(18.18)            | 37(17.87)             |                     |
| Status                       |                      |                       |                     |
| ANED                         | 41(69.49)            | 147(66.82)            | 0.7561              |
| Others                       | 18(30.51)            | 73(33.18)             |                     |

\*Pvalue calculated by logistic linear regression

<sup>^</sup>Pvalue calculated by Fisher exact test

The results of the association between HIF1 $\alpha$  and the clinical-pathological variables are summarized in **Table 3**. 66/279 (24%) of cases did not express HIF1 $\alpha$  and 213/279 (76%) did (**Fig 3A, 3B**). There was an association between HIF1 $\alpha$  and histologic subtype and tumor grade (p=0.018 and 0.0368 respectively). This lead us to the conclusion that endometrioid adenocarcinomas are more likely to express HIF1 $\alpha$  than clear cell and serous adenocarcinomas. In addition, high grade tumors, G2 and G3, are more likely to express HIF1 $\alpha$  than low grade tumors (G1).

**Table 3. Association of IHF $\alpha$  IHC with Clinicopathologic Variables.**

| Variables                    | Negative<br>(n = 66) | Positive<br>(n = 213) | P value |
|------------------------------|----------------------|-----------------------|---------|
| Age (median)                 | 65                   | 65                    | 0.3571* |
| Myometrial invasion (median) | 40                   | 25                    | 0.0646^ |
| Stage                        |                      |                       |         |
| I                            | 39(59.09)            | 142(66.67)            | 0.6376  |
| II                           | 10(15.15)            | 25(11.74)             |         |
| III                          | 11(16.67)            | 32(15.02)             |         |
| IV                           | 6(9.09)              | 14(6.57)              |         |
| Tumor Size                   |                      |                       |         |
| <=2 cm                       | 15(22.73)            | 47(22.07)             | 1       |
| >2 cm                        | 51(77.27)            | 166(77.93)            |         |
| LVI                          |                      |                       |         |
| N                            | 46(69.7)             | 156(73.24)            | 0.6367  |
| Y                            | 20(30.3)             | 57(26.76)             |         |
| Grade_FIGO                   |                      |                       |         |
| 1                            | 22(33.33)            | 97(45.54)             | 0.0231  |
| 2                            | 9(13.64)             | 44(20.66)             |         |
| 3                            | 35(53.03)            | 72(33.8)              |         |
| Grade_nuclear                |                      |                       |         |
| 1                            | 19(28.79)            | 74(34.74)             | 0.0368  |
| 2                            | 12(18.18)            | 63(29.58)             |         |
| 3                            | 35(53.03)            | 76(35.68)             |         |
| Lymph node status            |                      |                       |         |
| Positive                     | 14(26.92)            | 36(27.07)             | 1       |

|                   |                     |           |            |              |
|-------------------|---------------------|-----------|------------|--------------|
|                   | <b>Negative</b>     | 38(73.08) | 97(72.93)  |              |
| <b>Subtype</b>    | <b>CCC+Serous</b>   | 26(39.39) | 51(23.94)  |              |
|                   | <b>Endometrioid</b> | 40(60.61) | 162(76.06) | <b>0.018</b> |
| <b>Recurrence</b> | <b>N</b>            | 48(81.36) | 167(82.27) |              |
|                   | <b>Y</b>            | 11(18.64) | 36(17.73)  | 0.849        |
| <b>Status</b>     | <b>ANED</b>         | 40(60.61) | 148(69.48) |              |
|                   | <b>Others</b>       | 26(39.39) | 65(30.52)  | 0.1805       |

\*Pvalue calculated by logistic linear regression

^Pvalue calculated by Fisher exact test

Finally, neither ALDC nor HIF1 $\alpha$  proteins individually, or any combination of their expressions, (ALDC+/HIF1 $\alpha$ -), (ALDC+/HIF1 $\alpha$ +), (ALDC-/HIF1 $\alpha$ +), (ALDC-/HIF1 $\alpha$ -), had an impact on disease outcome such as recurrence, progression or death of disease.

**Discussion:**

HIF1 $\alpha$  is a transcription factor and it is a major regulator of oxygen homeostasis within cells, [14]. It plays an important role in tumorigenesis through its enhancement of angiogenesis via regulation of vascular endothelial growth factor (VEGF) transcription which promotes endothelial cell migration toward a hypoxic area. In addition, in hypoxic conditions, HIF1 $\alpha$  regulates metabolism by shifting the production of ATP via oxidative phosphorylation to anaerobic metabolism by stimulation of a variety of glycolytic enzymes, including ALDC, [17,18]. Even though this relation between HIF1 $\alpha$  and ALDC is well established in vitro and animal models, their association in human cancer tissues, namely endometrial cancer, is still widely unexplored. Our main goal was to evaluate the expression of ALDC and HIF1 $\alpha$  in a large series of cases of endometrial cancer. We found that ALDC and HIF1 $\alpha$  were both expressed in the majority of endometrial cancer cases and they were negative in normal endometrium. In addition, a strong positive association between HIF1 $\alpha$  and ALDC was seen in these cases.

Previously, using cDNA microarray, we showed that one of the genes that is upregulated in uterine serous carcinoma (USC) in comparison to endometrioid adenocarcinoma (EAC) is *aldolaseC*, [19, 20]. Furthermore, qRT-PCR showed that ALDC mRNA level was overexpressed in endometrial carcinomas in comparison to normal endometrium, but there was no association between ALDC-mRNA level and the endometrial cancer subtypes, [21]. Similarly, in this



1  
2  
3 study, we found that ALDC was not associated with tumor subtype. However, it  
4  
5 was associated with one of the most reliable pathological prognostic factors of  
6  
7 poor outcome, depth of myometrial invasion. In addition, we found that  
8  
9 overexpression of HIF1 $\alpha$  is associated with high tumor grade, another major  
10  
11 prognostic factor of poor outcome in patients with EC. This further confirms that  
12  
13 ALDC and HIF1 $\alpha$  overexpression may be related to tumor aggressiveness,  
14  
15 [15,22]. All the above data leads us to suggest that these two proteins may be key  
16  
17 regulators in endometrial carcinogenesis.  
18  
19  
20  
21

22 Recently, with clearer understanding of the function of HIF1 $\alpha$  and its  
23  
24 pathway, efforts directed at manipulation of this complex in order to decrease  
25  
26 cellular HIF1 $\alpha$  levels in tumor cells have been undertaken. Thus, modulation of  
27  
28 HIF1 $\alpha$  and its pathway promises to have a significant impact on cancer and it  
29  
30 seems to be an attractive therapeutic option for patients with endometrial cancer.  
31  
32  
33

34 In summary, ALDC and HIF1 $\alpha$  seem to play a role in the tumorigenesis of  
35  
36 endometrial cancer and their expression may be an indication of tumor  
37  
38 aggressiveness.  
39  
40  
41  
42  
43  
44  
45  
46  
47  
48  
49  
50  
51  
52  
53  
54

**Legends:**

**Fig 1A:** ALDC is negative in normal endometrium (x 40) and **Fig 1B.** HIF-1 $\alpha$  is negative/weakly positive in normal endometrium (x40).

**Fig 2A:** ALDC in endometrioid adenocarcinoma and in serous adenocarcinoma (**Fig 2B**). The staining is strong and cytoplasmic (x40).

**Fig 3A:** HIF-1 $\alpha$  in endometrioid adenocarcinoma and in serous adenocarcinoma (**Fig 3B**). The staining is strong and it has a nuclear pattern (x40).

**References:**

1. Jemal A, Siegel R, Ward E, et al. Cancer statistics, 2009. *CA Cancer J Clin* 2009;**59**:225-49.
2. Part J. Prognostic parameters of endometrial carcinoma. *Hum Pathol* 2004;**35**:649-662.
3. Kitchener HC, Trimble EL. Endometrial cancer state of the science meeting. *Int J Gynecol Cancer* 2009;**19**:134-140.
4. Naumann RW. Uterine papillary serous carcinoma: state of the state. *Curr Oncol Rep* 2008;**10**:505-11
5. Warburg O. On the origin of cancer cells. *Science* 1956;**123**:309-314.
6. Beckner ME, Stracke ML, Liotta LA, et al. Glycolysis as primary energy source in tumor chemotaxis. *J Natl Cancer Inst* 1990;**82**:1836-40.
7. Greiner EF, Guppy M, Brand K. Glucose is essential for proliferation and the glycolytic enzyme induction that provokes a transition to glycolytic energy production. *J Biol Chem* 1994;**269**:31484-490.
8. Saw RJ. Glucose metabolism and cancer. *Curr Opin Cell Biol* 2006;**18**:598-08.
9. Kurganov BI, Sugrobova NP, Mil'man LS. Supramolecular organization of glycolytic enzymes. *J Theor Biol* 1985;**116**:509-526.
10. Ronai Z. Glycolytic enzymes as DNA binding proteins. *Int J Biochem* 1993;**25**:1073-1076.
11. Marshall MJ, Goldberg DM, Neal FE, et al. Enzymes of glucose metabolism in carcinoma of the cervix and endometrium of the human uterus. *Br J Cancer* 1978;**37**:990-01.
12. Takashi M, Haimoto H, Koshikawa T, et al. Expression of aldolaseC isozyme in renal cell carcinoma. *Am J Clin Pathol* 1990;**93**:631-36.
13. Ojika T, Imaizumi M, Abe T, et al. Immunochemical and immunohistochemical studies on three aldolase isozymes in human lung cancer. *Cancer* 1991;**67**:2153-58.
14. Zeillo JE, Jovin IS, Huang Y. Hypoxia-inducible factor (HIF)-1 regulatory pathway and its potential for therapeutic intervention in malignancy and ischemia. *Yale J Biol Med* 2007;**80**:51-60.
15. Horree N, van Diest PJ, van der Groep P, et al. Hypoxia and angiogenesis in endometrioid endometrial carcinogenesis. *Cell Oncol* 2007;**29**:219-227.
16. FIGO announcements, stages-1988 Revision (1989) *Gynecol Oncol* 35;125.
17. Patel PS, Rawal GN, Balar DB. Combined use of serum enzyme levels as tumor markers in cervical carcinoma patients. *Tumour Biol* 1994;**15**:45-51.
18. Jean JC, Rich CB, Joyce-Brady M. Hypoxia results in an HIF-1-dependent induction of brain-specific aldolaseC in lung epithelial cells. *Am J Physiol Lung Cell Mol Physiol* 2006;**291**:L950-56.
19. Mhawech-Fauceglia P, Wang D, Kesterson J, et al. Gene expression profiles in stage I uterine serous carcinoma in comparison to grade 3 and grade 1 stage I endometrioid adenocarcinoma. *PLoS One*. 2011 Mar 23;**6**(3):e18066.

- 1
  - 2
  - 3
  - 4
  - 5
  - 6
  - 7
  - 8
  - 9
  - 10
  - 11
  - 12
  - 13
  - 14
  - 15
  - 16
  - 17
  - 18
  - 19
  - 20
  - 21
  - 22
  - 23
  - 24
  - 25
  - 26
  - 27
  - 28
  - 29
  - 30
  - 31
  - 32
  - 33
  - 34
  - 35
  - 36
  - 37
  - 38
  - 39
  - 40
  - 41
  - 42
  - 43
  - 44
  - 45
  - 46
  - 47
  - 48
  - 49
  - 50
  - 51
  - 52
  - 53
  - 54
  - 55
  - 56
  - 57
  - 58
  - 59
  - 60
20. Mhaweche-Fauceglia P, Wang D, Kesterson J, et al. Microarray analysis reveals distinct gene expression profiles among different tumor histology, stage and disease outcomes in endometrial adenocarcinoma. PLoS One. 2010;5:e15415.
21. Mhaweche-Fauceglia P, Wang D, Kesterson et al. Aldolase mRNA expression in endometrial cancer and the role of clotrimazole in endometrial cancer cell viability and morphology. Histopathology. 2011;59:1015-8.
22. Seeber LMS, Horree N, van der Groep P. et al. Necrosis related HIF-1a expression predicts prognosis in patients with endometrioid endometrial carcinoma. BMC Cancer 2010;10:307-3118.

1  
2  
3  
4  
5  
6  
7  
8  
9  
10  
11  
12  
13  
14  
15  
16  
17  
18  
19  
20  
21  
22  
23  
24  
25  
26  
27  
28  
29  
30  
31  
32  
33  
34  
35  
36  
37  
38  
39  
40  
41  
42  
43  
44  
45  
46  
47  
48  
49  
50  
51  
52  
53  
54  
55  
56  
57  
58  
59  
60

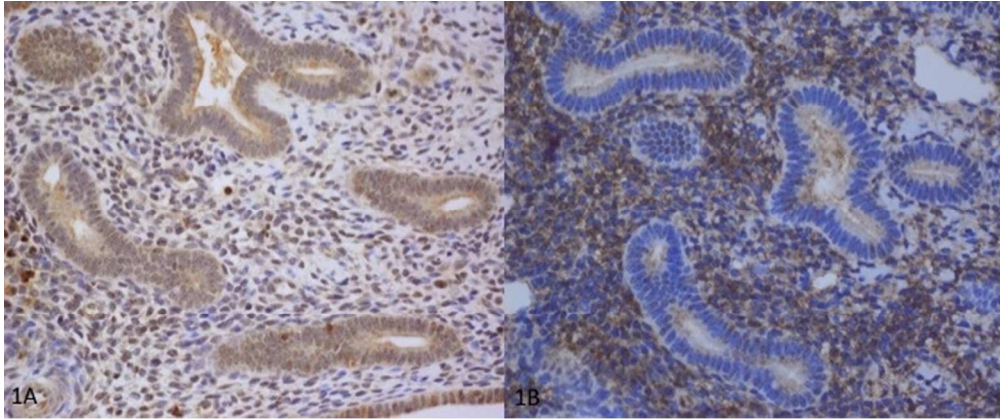

253x105mm (72 x 72 DPI)

Peer review only

1  
2  
3  
4  
5  
6  
7  
8  
9  
10  
11  
12  
13  
14  
15  
16  
17  
18  
19  
20  
21  
22  
23  
24  
25  
26  
27  
28  
29  
30  
31  
32  
33  
34  
35  
36  
37  
38  
39  
40  
41  
42  
43  
44  
45  
46  
47  
48  
49  
50  
51  
52  
53  
54  
55  
56  
57  
58  
59  
60

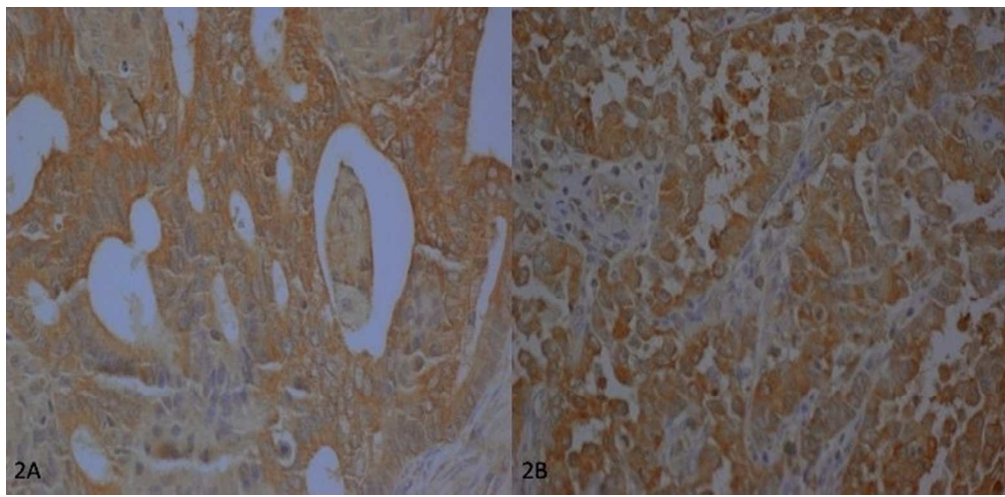

252x122mm (72 x 72 DPI)

er review only

1  
2  
3  
4  
5  
6  
7  
8  
9  
10  
11  
12  
13  
14  
15  
16  
17  
18  
19  
20  
21  
22  
23  
24  
25  
26  
27  
28  
29  
30  
31  
32  
33  
34  
35  
36  
37  
38  
39  
40  
41  
42  
43  
44  
45  
46  
47  
48  
49  
50  
51  
52  
53  
54  
55  
56  
57  
58  
59  
60

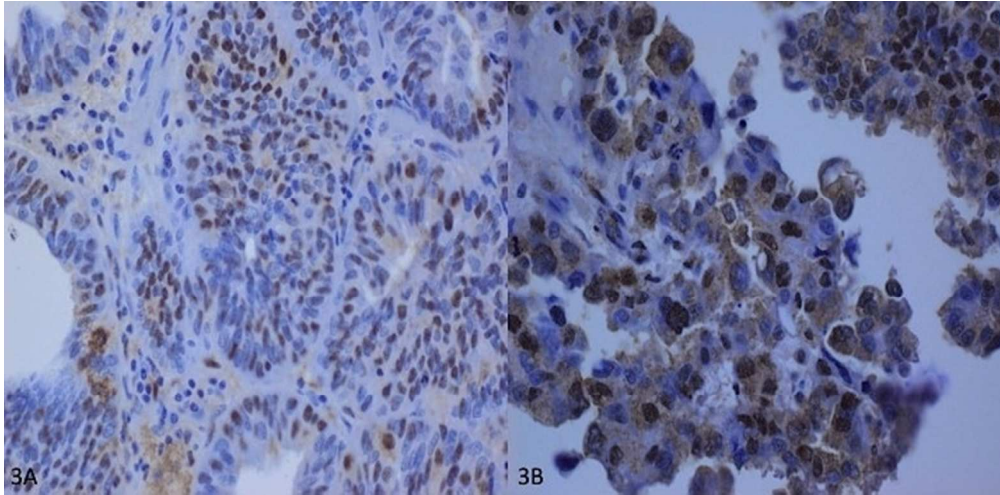

252x124mm (72 x 72 DPI)

er review only





**The role of Hypoxic-inducible Factor (HIF1 $\alpha$ ) and Aldolase C Protein in Endometrial Carcinogenesis: A retrospective Study of 279 Patients.**

|                                 |                                                                                                                                                                                                                              |
|---------------------------------|------------------------------------------------------------------------------------------------------------------------------------------------------------------------------------------------------------------------------|
| Journal:                        | <i>BMJ Open</i>                                                                                                                                                                                                              |
| Manuscript ID:                  | bmjopen-2012-001450.R1                                                                                                                                                                                                       |
| Article Type:                   | Research                                                                                                                                                                                                                     |
| Date Submitted by the Author:   | 10-Jul-2012                                                                                                                                                                                                                  |
| Complete List of Authors:       | Mhawech-Fauceglia, Paulette; usc, wang, dan; RPCI, samrao, damanzoopinder; USC, Menesses, Teodulo; USC, Godoy, heidi; RPCI, ough, faith; USC, Lele, shahikant; RPCI, liu, song; RPCI, pejovic, tanja; oregon health science, |
| <b>Primary Subject Heading</b>: | Pathology                                                                                                                                                                                                                    |
| Secondary Subject Heading:      | Oncology, Reproductive medicine, obstetrics and gynaecology                                                                                                                                                                  |
| Keywords:                       | Pathology < BASIC SCIENCES, GYNAECOLOGY, Gynaecological oncology < GYNAECOLOGY                                                                                                                                               |
|                                 |                                                                                                                                                                                                                              |

SCHOLARONE™  
Manuscripts

only



1  
2  
3 **The role of Hypoxic-inducible Factor (HIF1 $\alpha$ ) and Aldolase C Protein in**  
4  
5 **Endometrial Carcinogenesis: A retrospective Study of 279 Patients.**  
6  
7

8 **Paulette Mhaweck-Fauceglia<sup>1</sup>, Dan Wang<sup>2</sup>, Damanzoopinder Samrao<sup>1</sup>, Teodulo**  
9  
10 **Menesses<sup>1</sup>, Heidi Godoy<sup>3</sup>, Faith Ough<sup>1</sup>, Shashikant Iele<sup>3</sup>, Song Liu<sup>2</sup>, Tanja Pejovic<sup>4</sup>**  
11  
12

13  
14  
15  
16  
17  
18 <sup>1</sup> Department of Pathology at University of Southern California, Los Angeles-CA  
19

20 <sup>2</sup>Department of Biostatistics, <sup>3</sup>Department of Gynecologic Oncology at Roswell Park  
21  
22 Cancer Institute, Buffalo NY, <sup>4</sup>Division of Gynecologic Oncology at Oregon Health &  
23  
24 Science University and the Knight Cancer Institute, Portland, Oregon  
25  
26  
27  
28  
29  
30  
31  
32  
33  
34  
35  
36  
37

38 **Corresponding Author:**

39 Paulette Mhaweck-Fauceglia, MD  
40 Department of Pathology  
41 University of Southern California  
42 1200 N. State Street. Room 7A116  
43 Los Angeles, California 90033-5000  
44 E-mail: pfauceglia@hotmail.com  
45  
46  
47  
48  
49  
50  
51  
52  
53  
54

**Abstract:**

**Objectives:** Hypoxia-inducible factor (HIF1 $\alpha$ ) plays an integral role in response to hypoxia, controlling dozens of target genes including aldolaseC (ALDC), an important enzyme in the glycolytic pathway. It also induces angiogenesis, allowing survival and proliferation of cancer cells. Thus, inhibition of HIF1 $\alpha$  may be an attractive therapeutic option. The aims of our study were to (1) evaluate the expressions of HIF1 $\alpha$  and ALDC in patients with endometrial cancer (EC) and define their association with disease outcome and (2) determine the existence of an association between HIF1 $\alpha$  and ALDC proteins. **Design:** We performed immunohistochemistry using antibodies to ALDC and HIF1 $\alpha$  on paraffin-embedded tissue from 279 patients. The association of ALDC and HIF1 $\alpha$  immunoexpression was evaluated, as well as the association of their expressions with the following clinical parameters; age, histologic subtype, myometrial depth of invasion, lymphovascular invasion, FIGO grade, lymph nodes status, and disease status. **Results:** ALDC and HIF1 $\alpha$  were overexpressed in the vast majority of EC cases (78% and 76% respectively). There was a strong positive association between HIF1 $\alpha$  and ALDC (p=0.0017). There was a significant association between ALDC and depth of myometrial invasion (p=0.0438), and between HIF1 $\alpha$  and tumor grade (p= 0.0231) and tumor subtype (p=0.018). However, there was no association between either ALDC nor HIF1 $\alpha$  and disease status. **Conclusions:** ALDC and HIF1 $\alpha$  play an important role in endometrial carcinogenesis. Their expression by the majority of EC makes inhibition of HIF1 $\alpha$  a very attractive therapeutic option for treating patients with EC and we suggest that will be prospectively validated in future studies.

1  
2  
3 **Key words:** HIF1 $\alpha$ ; AldolaseC; Immunohistochemistry; Endometrial cancer; Disease  
4  
5  
6 outcome.

7  
8  
9  
10 **Subject headings:** HIF1 $\alpha$  and aldolaseC in endometrial cancer  
11  
12

13  
14  
15 **Article Summary:**

16  
17 1- Article focus:

- 18  
19  
20
  - HIF1  $\alpha$  and aldolase C expressions in patients with endometrial cancer
  - HIF1  $\alpha$  and aldolase C interaction in vivo in endometrial cancer.
  - HIF1  $\alpha$  and aldolaseC value in predicting disease outcome in patients with  
27 endometrial cancer.

28  
29  
30 2- Key messages:

- 31  
32
  - HIF1  $\alpha$  and aldolase C are frequently expressed in endometrial cancer.
  - There is strong association between HIF1  $\alpha$  and aldolase C in endometrial cancer  
36 and therefore they could play an important role in its pathogenesis.
  - HIF1  $\alpha$  and aldolase C are associated with poor prognostic factors.
  - HIF1  $\alpha$  and aldolase C are not independent predictive biomarkers of poor  
44 outcome.

45  
46 3- Strengths:

- 47  
48
  - It is a large study of 279 patients.
  - It is one of the few in the literature.

49  
50  
51  
52  
53  
54  
55  
56 3  
57  
58  
59  
60

- 1  
2  
3  
4  
5  
6  
7
- It is the first to evaluate the association of HIF1  $\alpha$  and aldolase C in vivo in endometrial cancer.

8  
9

Limitations:

- 10  
11  
12  
13  
14  
15  
16  
17  
18  
19  
20  
21  
22  
23  
24  
25  
26  
27  
28  
29  
30  
31  
32  
33  
34  
35  
36  
37  
38  
39  
40  
41  
42  
43  
44  
45  
46  
47  
48  
49  
50  
51  
52  
53  
54
- The study did not have a large numbers of type II cancers (serous and clear cell carcinomas).
  - The study did not contain too many cases of late stage tumors (stage III and IV).

**Study approval:**

This study was approved by the IRB committee and was conducted with maintenance of respect to privacy of all patients throughout.

**Funding statement:**

We, the authors, declare that there was no funding for this study.

**Competing interests:**

We, the authors, declare that there is no competing interest with this study.

**Contribution statement:**

PMF: designed and wrote the study

DW, SL: performed the statistical analysis

DS, HG, TM: reviewed the patients charts

DS, FO: helped in reviewing the manuscript.

SL (Shashikant Lele), TP: Conducting and writing the study

**Introduction:**

Endometrial cancer (EC) is the most common gynecologic malignancy in developed countries. There are approximately 42,000 cases diagnosed annually in the United States, resulting in almost 8,000 deaths, [1]. EC has been classified into two types based on morphology, pathogenesis, behavior and treatment: type I (endometrioid and mucinous carcinomas), and type II (serous and clear cell carcinomas). Type I is usually low-grade and low stage at initial presentation. Type II is usually high grade and advanced stage at initial presentation. The most reliable prognostic factors in predicting disease outcome in EC are tumor grade, tumor stage, tumor subtype, depth of myometrial invasion, and lymph node involvement, [2-4].

One of the most prominent metabolic alterations in cancer cells is an increase in aerobic glycolysis, known as the Warburg effect after its discovery by Otto Warburg in 1920, [5]. This increase in glycolysis, due to a shift in glucose metabolism from oxidative phosphorylation into the aerobic glycolysis pathway, provides the tumor with metabolic and survival advantages, [6-8]. Aldolase, a critical enzyme in the glycolytic pathway, catalyses the reversible conversion of fructose-1,6-biphosphate to glyceraldehyde-3-phosphate and dihydroxyacetone phosphate. Aldolase has three distinct isoenzymes, A, B, and C, which are similar in sequence with 78% identity between A and C and 68% identity between B and C, [9,10]. Originally identified in brain tissue, aldolaseC (ALDC) has been seen to be overexpressed in carcinomas of the lung, kidney, cervix and endometrium, [11-13].

6

1  
2  
3 The Hypoxic-inducible factor (HIF1) gene codes for two subunits,  $\alpha$  and  $\beta$ , and is  
4 usually activated by hypoxic conditions, a microenvironment that commonly  
5  
6  
7  
8  
9  
10  
11  
12  
13  
14  
15  
16  
17  
18  
19  
20  
21  
22  
23  
24  
25  
26  
27  
28  
29  
30  
31  
32  
33  
34  
35  
36  
37  
38  
39  
40  
41  
42  
43  
44  
45  
46  
47  
48  
49  
50  
51  
52  
53  
54  
55  
56  
57  
58  
59  
60

The Hypoxic-inducible factor (HIF1) gene codes for two subunits,  $\alpha$  and  $\beta$ , and is usually activated by hypoxic conditions, a microenvironment that commonly accompanies cancerous tumors. When activated, HIF1 can interact with enzymes and other transcription factors in order to control vascularization and tissue growth. HIF1 $\alpha$  was recently identified as a potent regulator of ALDC, another mechanism by which it may promote carcinogenesis, [14]. Thus, attempts to target the HIF1 $\alpha$  pathway in hopes of suppressing cancer cell proliferation and progression are underway. In the gynecologic tract, HIF1 $\alpha$  expression increases as the endometrium undergoes changes from normal to premalignant to endometrioid adenocarcinoma. This is paralleled by increased angiogenesis in the endometrium suggesting that HIF1 $\alpha$  might be a key regulator in endometrial carcinogenesis, [15].

Though the interaction between HIF1 $\alpha$  and ALDC has been seen in vivo, their interaction in human samples and in endometrial carcinoma has not yet been described. Therefore, the aims of this study are (1) to evaluate the expression of HIF1 $\alpha$  and ALDC proteins in patients with endometrial cancer and to find an association between these two proteins in this patient sample and (2)- to determine whether either of these two proteins independently or any combination of their expressions might have an impact on disease outcome.

## Materials and Methods:

**Patient population:** After obtaining IRB approval, the pathology archives were searched for endometrial carcinoma cases from January 2000-December 2010. Data was extracted from clinical charts including patients' age at the time of diagnosis, surgical stage, post-operative therapy, site of recurrence, and cause and time of death. All patients underwent surgical staging with a total hysterectomy and bilateral salpingo-oophorectomy (TAH+BSO), and pelvic washings. Pelvic and para-aortic lymphadenectomy was performed for patients with advanced stage disease and high grade tumors. Patients were treated according to the National Comprehensive Cancer Network (NCCN) guidelines ([www.cancer.gov](http://www.cancer.gov)).

**Histological evaluation:** Tumor grade was assessed using the International Federation of Gynecology and Obstetrics (FIGO) system and by nuclear grading. FIGO grading was determined as follows; tumors with <5% solid areas were grade 1 (G1), tumors with 5%-50% solid areas were grade 2 (G2) and tumors with > 50% solid areas were grade 3 (G3). Tumors nuclear grade was determined by the variation in nuclear size and shape, chromatin distribution and size of the nucleoli. Grade 1 nuclei are oval, mildly enlarged, and have evenly dispersed chromatin. Grade 3 nuclei are markedly enlarged and pleomorphic and have prominent eosinophilic nucleoli. Grade 2 nuclei have features between G1 and G3. Tumor stage was assigned based on 1988 FIGO surgical staging guidelines (FIGO, 1989). [16]. All slides were examined by an expert gynecologic pathologist for confirmation of the histologic type, tumor size, tumor grade, depth of myometrial invasion (MI) and presence of lymphovascular invasion (LVI).

8



1  
2  
3 **Immunohistochemistry:** Four  $\mu\text{m}$  thick sections from 279 cases were deparaffinized  
4 with xylene and washed with ethanol. In addition, 5 sections from normal endometrium  
5 were also included in the study. Sections were cooled for 20 minutes and incubated for 10  
6 minutes with 3%  $\text{H}_2\text{O}_2$  to quench endogenous peroxidase activity. Blocking was  
7 performed using a serum-free protein block, Dakocytomation (Carpenteria, CA), for 30  
8 minutes. The sections were pretreated with an EDTA buffer saline solution, steamed for  
9 20 minutes and then sections were incubated with HIF1 $\alpha$  (monoclonal; 1:1000 dilution;  
10 Novus Biologicals, Littleton, CO-USA) and aldolaseC (monoclonal; 1:250 dilution;  
11 Sigma-Aldrich, St. Louis, MO) for 1 hour at room temperature. The diaminobenzidine  
12 complex was used as a chromogen. Negative control slides omitting the primary antibody  
13 were included in all assays. Breast cancer was used as positive controls for HIF1  $\alpha$  and  
14 ALDC. The extent of immunochemical reactivity was graded based on intensity as  
15 follows: 0 (negative), 1+ (weak), 2+ (moderate), 3+ (strong). For the sake of statistical  
16 analysis, negative and weak stains were grouped as group I (negative) and moderate and  
17 strong as group II (positive).  
18  
19  
20  
21  
22  
23  
24  
25  
26  
27  
28  
29  
30  
31  
32  
33  
34  
35  
36  
37

38 **Statistical Analyses:** The clinical parameters used for modeling were age, tumor size,  
39 histologic subtype, tumor stage, myometrial depth of invasion, LVI, FIGO grade, nuclear  
40 grade, lymph node status, recurrence, recurrence time, survival time and status. To test  
41 the association between aldolaseC/HIF1 $\alpha$  IHC (positive and negative) and the clinical  
42 parameters, Fisher's exact test was performed for categorical parameters and the logistic  
43 regression model was used for continuous ones. Pearson correlation was used to check  
44  
45  
46  
47  
48  
49  
50  
51  
52  
53  
54

1  
2  
3 the association of IHC between aldolaseC and HIF1 $\alpha$ . All statistical analysis was  
4  
5 performed using the statistical software package R (<http://www.r-project.org/>).  
6  
7  
8  
9  
10  
11  
12  
13  
14  
15  
16  
17  
18  
19  
20  
21  
22  
23  
24  
25  
26  
27  
28  
29  
30  
31  
32  
33  
34  
35  
36  
37  
38  
39  
40  
41  
42  
43  
44  
45  
46  
47  
48  
49  
50  
51  
52  
53  
54  
55  
56  
57  
58  
59  
60

**Results:****Clinical and pathological features:**

279 patients diagnosed with endometrial carcinoma were included in the study.

The age ranged from 29 to 97 years (median age 65 years). The follow-up period ranged from 0 (as one patient was lost for follow-up) to 137.16 months (median 46.32 months).

The clinical and histological features are summarized in Table 1.

| <b>Table 1. Clinical and pathologic features of patients (data in parentheses are percentages).</b> |                     |            |
|-----------------------------------------------------------------------------------------------------|---------------------|------------|
| <b>Characteristics</b>                                                                              |                     |            |
| <b>No. of evaluable patients</b>                                                                    |                     | 279        |
| <b>Age, year</b>                                                                                    |                     |            |
|                                                                                                     | <b>Median</b>       | 65         |
|                                                                                                     | <b>Range</b>        | 29-97      |
| <b>Follow time, months</b>                                                                          |                     |            |
|                                                                                                     | <b>Median</b>       | 46.32      |
|                                                                                                     | <b>Range</b>        | (0-137.16) |
| <b>Stage</b>                                                                                        |                     |            |
|                                                                                                     | I                   | 181(64.87) |
|                                                                                                     | II                  | 35(12.54)  |
|                                                                                                     | III                 | 43(15.41)  |
|                                                                                                     | IV                  | 20(7.17)   |
| <b>Subtype</b>                                                                                      |                     |            |
|                                                                                                     | <b>Endometrioid</b> | 202(72.4)  |
|                                                                                                     | <b>CCC+serous</b>   | 77(27.6)   |
| <b>Grade(FIGO)</b>                                                                                  |                     |            |
|                                                                                                     | 1                   | 119(42.65) |
|                                                                                                     | 2                   | 53(19)     |
|                                                                                                     | 3                   | 107(38.35) |
| <b>Grade(Nuclear)</b>                                                                               |                     |            |
|                                                                                                     | 1                   | 93(33.33)  |
|                                                                                                     | 2                   | 75(26.88)  |
|                                                                                                     | 3                   | 111(39.78) |
| <b>Tumor size, cm</b>                                                                               |                     |            |
|                                                                                                     | ≤2                  | 62(22)     |
|                                                                                                     | >2                  | 217(78)    |
| <b>Depth of invasion</b>                                                                            |                     |            |
|                                                                                                     | <b>Median</b>       | 28         |
|                                                                                                     | <b>Range</b>        | 0-100      |
| <b>LVI</b>                                                                                          |                     |            |
|                                                                                                     | <b>N</b>            | 202(72.4)  |

11

|                   |                                          |            |
|-------------------|------------------------------------------|------------|
|                   | Y                                        | 77(27.6)   |
| Lymph node status | Positive                                 | 50(17.92)  |
|                   | Negative                                 | 135(48.39) |
|                   | Unknown                                  | 94(33.69)  |
| Recurrence        | N                                        | 215(77.06) |
|                   | Y                                        | 47(16.85)  |
|                   | Persistent                               | 12(4.3)    |
|                   | Progression                              | 4(1.43)    |
|                   | Unknown                                  | 1(0.36)    |
| Status            | Alive with no evidence of disease (ANED) | 188(67.38) |
|                   | Alive with evidence of disease (AWED)    | 22(7.89)   |
|                   | Dead of disease (DOD)                    | 38(13.62)  |
|                   | Dead with no evidence of disease (DNED)  | 22(7.89)   |
|                   | dead unknown cause                       | 1(0.36)    |
|                   | Dead with evidence of disease(DWED)      | 7(2.51)    |
|                   | lost for FU                              | 1(0.36)    |

#### AldolaseC and HIF1 $\alpha$ immunoexpressions:

The staining patterns were nuclear for HIF1 $\alpha$  and cytoplasmic for ALDC. The 5 cases of normal endometrium all came from patients who underwent a hysterectomy for benign reasons, such as fibroids, and were weakly positive for ALDC and negative for HIF1 $\alpha$  (**Fig 1A, 1B**). There was a strong positive association between ALDC and HIF1 $\alpha$  proteins ( $p=0.0017$ ) in endometrial cancer. The results of the association of ALDC and the clinical-pathological variables are shown in **Table 2**. 59/279 (22%) of cases were negative for ALDC protein and 220/279 (78%) were positive (**Fig 2A, 2B**). ALDC was only associated with depth of myometrial invasion ( $p=0.0438$ ), leading to the conclusion that tumors that invade deeper into the myometrium are more likely to overexpress ALDC.

**Table 2. Association of AldolaseC IHC with Clinicopathologic Variables.**

| Variables | Negative | Positive | P value |
|-----------|----------|----------|---------|
| 12        |          |          |         |

|                                     | (n = 59)  | (n = 220)  |         |
|-------------------------------------|-----------|------------|---------|
| <b>Age (median)</b>                 | 69        | 65         | 0.4*    |
| <b>Myometrial invasion (median)</b> | 21        | 31.5       | 0.0438  |
| <b>Stage</b>                        |           |            |         |
| <b>I</b>                            | 41(69.49) | 140(63.64) |         |
| <b>II</b>                           | 8(13.56)  | 27(12.27)  | 0.7656  |
| <b>III</b>                          | 7(11.86)  | 36(16.36)  |         |
| <b>IV</b>                           | 3(5.08)   | 17(7.73)   |         |
| <b>Tumor Size</b>                   |           |            |         |
| <b>&lt;=2 cm</b>                    | 15(25.42) | 47(21.36)  | 0.4866^ |
| <b>&gt;2 cm</b>                     | 44(74.58) | 173(78.64) |         |
| <b>LVI</b>                          |           |            |         |
| <b>N</b>                            | 46(77.97) | 156(70.91) | 0.3273  |
| <b>Y</b>                            | 13(22.03) | 64(29.09)  |         |
| <b>Grade_FIGO</b>                   |           |            |         |
| <b>1</b>                            | 24(40.68) | 95(43.18)  |         |
| <b>2</b>                            | 11(18.64) | 42(19.09)  | 0.9266  |
| <b>3</b>                            | 24(40.68) | 83(37.73)  |         |
| <b>Grade_nuclear</b>                |           |            |         |
| <b>1</b>                            | 15(25.42) | 78(35.45)  |         |
| <b>2</b>                            | 19(32.2)  | 56(25.45)  | 0.3096  |
| <b>3</b>                            | 25(42.37) | 86(39.09)  |         |
| <b>Lymph node status</b>            |           |            |         |
| <b>Positive</b>                     | 6(16.22)  | 44(29.73)  | 0.1461  |
| <b>Negative</b>                     | 31(83.78) | 104(70.27) |         |
| <b>Subtype</b>                      |           |            |         |
| <b>CCC+Serous</b>                   | 17(28.81) | 60(27.27)  | 0.87    |
| <b>Endometrioid</b>                 | 42(71.19) | 160(72.73) |         |
| <b>Recurrence</b>                   |           |            |         |
| <b>N</b>                            | 45(81.82) | 170(82.13) | 1       |
| <b>Y</b>                            | 10(18.18) | 37(17.87)  |         |
| <b>Status</b>                       |           |            |         |
| <b>ANED</b>                         | 41(69.49) | 147(66.82) | 0.7561  |
| <b>Others</b>                       | 18(30.51) | 73(33.18)  |         |

\*Pvalue calculated by logistic linear regression

^Pvalue calculated by Fisher exact test

The results of the association between HIF1 $\alpha$  and the clinical-pathological variables are summarized in **Table 3**. 66/279 (24%) of cases did not express HIF1 $\alpha$  and 213/279 (76%) did (**Fig 3A, 3B**). There was an association between HIF1 $\alpha$  and histologic subtype and tumor grade (p=0.018 and 0.0368 respectively). This lead us to the conclusion that endometrioid adenocarcinomas are more likely to express HIF1 $\alpha$  than clear cell and serous adenocarcinomas. In addition, high grade tumors, G2 and G3, are more likely to express HIF1 $\alpha$  than low grade tumors (G1).

**Table 3. Association of IHF1 $\alpha$  IHC with Clinicopathologic Variables.**

| Variables                           | Negative<br>(n = 66) | Positive<br>(n = 213) | P value |
|-------------------------------------|----------------------|-----------------------|---------|
| <b>Age (median)</b>                 | 65                   | 65                    | 0.3571* |
| <b>Myometrial invasion (median)</b> | 40                   | 25                    | 0.0646^ |
| <b>Stage</b>                        |                      |                       |         |
| I                                   | 39(59.09)            | 142(66.67)            | 0.6376  |
| II                                  | 10(15.15)            | 25(11.74)             |         |
| III                                 | 11(16.67)            | 32(15.02)             |         |
| IV                                  | 6(9.09)              | 14(6.57)              |         |
| <b>Tumor Size</b>                   |                      |                       |         |
| $\leq 2$ cm                         | 15(22.73)            | 47(22.07)             | 1       |
| $> 2$ cm                            | 51(77.27)            | 166(77.93)            |         |
| <b>LVI</b>                          |                      |                       |         |
| N                                   | 46(69.7)             | 156(73.24)            | 0.6367  |
| Y                                   | 20(30.3)             | 57(26.76)             |         |
| <b>Grade_FIGO</b>                   |                      |                       |         |
| 1                                   | 22(33.33)            | 97(45.54)             | 0.0231  |
| 2                                   | 9(13.64)             | 44(20.66)             |         |
| 3                                   | 35(53.03)            | 72(33.8)              |         |
| <b>Grade_nuclear</b>                |                      |                       |         |
| 1                                   | 19(28.79)            | 74(34.74)             | 0.0368  |
| 2                                   | 12(18.18)            | 63(29.58)             |         |
| 3                                   | 35(53.03)            | 76(35.68)             |         |
| <b>Lymph node status</b>            |                      |                       |         |
| Positive                            | 14(26.92)            | 36(27.07)             | 1       |

|                   |                     |           |            |              |
|-------------------|---------------------|-----------|------------|--------------|
|                   | <b>Negative</b>     | 38(73.08) | 97(72.93)  |              |
| <b>Subtype</b>    | <b>CCC+Serous</b>   | 26(39.39) | 51(23.94)  | <b>0.018</b> |
|                   | <b>Endometrioid</b> | 40(60.61) | 162(76.06) |              |
| <b>Recurrence</b> | <b>N</b>            | 48(81.36) | 167(82.27) | 0.849        |
|                   | <b>Y</b>            | 11(18.64) | 36(17.73)  |              |
| <b>Status</b>     | <b>ANED</b>         | 40(60.61) | 148(69.48) | 0.1805       |
|                   | <b>Others</b>       | 26(39.39) | 65(30.52)  |              |

\*Pvalue calculated by logistic linear regression

^Pvalue calculated by Fisher exact test

Finally, neither ALDC nor HIF1 $\alpha$  proteins individually, or any combination of their expressions, (ALDC+/HIF1 $\alpha$ -), (ALDC+/HIF1 $\alpha$ +), (ALDC-/HIF1 $\alpha$ +), (ALDC-/HIF1 $\alpha$ -), had an impact on disease outcome such as recurrence, progression or death of disease.

**Discussion:**

HIF1 $\alpha$  is a transcription factor and it is a major regulator of oxygen homeostasis within cells, [14]. It plays an important role in tumorigenesis through its enhancement of angiogenesis via regulation of vascular endothelial growth factor (VEGF) transcription which promotes endothelial cell migration toward a hypoxic area. In addition, in hypoxic conditions, HIF1 $\alpha$  regulates metabolism by shifting the production of ATP via oxidative phosphorylation to aerobic metabolism by stimulation of a variety of glycolytic enzymes, including ALDC, [17,18]. Even though this relation between HIF1 $\alpha$  and ALDC is well established in vitro and animal models, their association in human cancer tissues, namely endometrial cancer, is still widely unexplored. Our main goal was to evaluate the expression of ALDC and HIF1 $\alpha$  in a large series of cases of endometrial cancer. We found that ALDC and HIF1 $\alpha$  were both expressed in the majority of endometrial cancer cases and they were negative in normal endometrium. In addition, a strong positive association between HIF1 $\alpha$  and ALDC was seen in these cases.

Previously, using cDNA microarray, we showed that one of the genes that is upregulated in uterine serous carcinoma (USC) in comparison to endometrioid adenocarcinoma (EAC) is *aldolaseC*, [19, 20]. Furthermore, qRT-PCR showed that ALDC mRNA level was overexpressed in endometrial carcinomas in comparison to normal endometrium, but there was no association between ALDC-mRNA level and the endometrial cancer subtypes[21]. Similarly, in this



1  
2  
3 study, we found that ALDC was not associated with tumor subtype. However, it  
4  
5 was associated with one of the most reliable pathological prognostic factors of  
6  
7 poor outcome, depth of myometrial invasion. In addition, we found that  
8  
9 overexpression of HIF1 $\alpha$  is associated with high tumor grade, another major  
10  
11 prognostic factor of poor outcome in patients with EC. This further confirms that  
12  
13 ALDC and HIF1 $\alpha$  overexpression may be related to tumor aggressiveness,  
14  
15 [15,22]. All the above data leads us to suggest that these two proteins may be key  
16  
17 regulators in endometrial carcinogenesis.  
18  
19  
20  
21

22 Recently, with clearer understanding of the function of HIF1 $\alpha$  and its  
23  
24 pathway, efforts directed at manipulation of this complex in order to decrease  
25  
26 cellular HIF1 $\alpha$  levels in tumor cells have been undertaken. Thus, modulation of  
27  
28 HIF1 $\alpha$  and its pathway promises to have a significant impact on cancer and it  
29  
30 seems to be an attractive therapeutic option for patients with endometrial cancer.  
31  
32  
33 In summary, ALDC and HIF1 $\alpha$  seem to play a role in the tumorigenesis of  
34  
35 endometrial cancer and their expression may be an indication of tumor  
36  
37 aggressiveness, and we suggest that prospectively will be validated in future  
38  
39 studies.  
40  
41  
42  
43  
44  
45  
46  
47  
48  
49  
50  
51  
52  
53  
54

1  
2  
3  
4  
5  
6  
7  
8  
9  
10  
11  
12  
13  
14  
15  
16  
17  
18  
19  
20  
21  
22  
23  
24  
25  
26  
27  
28  
29  
30  
31  
32  
33  
34  
35  
36  
37  
38  
39  
40  
41  
42  
43  
44  
45  
46  
47  
48  
49  
50  
51  
52  
53  
54  
55  
56  
57  
58  
59  
60

**Legends:**

**Fig 1A:** ALDC is negative in normal endometrium (x 40) and **Fig 1B.** HIF-1 $\alpha$  is negative/weakly positive in normal endometrium (x40).

**Fig 2A:** ALDC in endometrioid adenocarcinoma and in serous adenocarcinoma (**Fig 2B**). The staining is strong and cytoplasmic (x40).

**Fig 3A:** HIF-1 $\alpha$  in endometrioid adenocarcinoma and in serous adenocarcinoma (**Fig 3B**). The staining is strong and it has a nuclear pattern (x40).

**References:**

1. Jemal A, Siegel R, Ward E, et al. Cancer statistics, 2009. *CA Cancer J Clin* 2009;**59**:225-49.
2. Part J. Prognostic parameters of endometrial carcinoma. *Hum Pathol* 2004;**35**:649-662.
3. Kitchener HC, Trimble EL. Endometrial cancer state of the science meeting. *Int J Gynecol Cancer* 2009;**19**:134-140.
4. Naumann RW. Uterine papillary serous carcinoma: state of the state. *Curr Oncol Rep* 2008;**10**:505-11
5. Warburg O. On the origin of cancer cells. *Science* 1956;**123**:309-314.
6. Beckner ME, Stracke ML, Liotta LA, et al. Glycolysis as primary energy source in tumor chemotaxis. *J Natl Cancer Inst* 1990;**82**:1836-40.
7. Greiner EF, Guppy M, Brand K. Glucose is essential for proliferation and the glycolytic enzyme induction that provokes a transition to glycolytic energy production. *J Biol Chem* 1994;**269**:31484-490.
8. Saw RJ. Glucose metabolism and cancer. *Curr Opin Cell Biol* 2006;**18**:598-08.
9. Kurganov BI, Sugrobova NP, Mil'man LS. Supramolecular organization of glycolytic enzymes. *J Theor Biol* 1985;**116**:509-526.
10. Ronai Z. Glycolytic enzymes as DNA binding proteins. *Int J Biochem* 1993;**25**:1073-1076.
11. Marshall MJ, Goldberg DM, Neal FE, et al. Enzymes of glucose metabolism in carcinoma of the cervix and endometrium of the human uterus. *Br J Cancer* 1978;**37**:990-01.
12. Takashi M, Haimoto H, Koshikawa T, et al. Expression of aldolaseC isozyme in renal cell carcinoma. *Am J Clin Pathol* 1990;**93**:631-36.
13. Ojika T, Imaizumi M, Abe T, et al. Immunochemical and immunohistochemical studies on three aldolase isozymes in human lung cancer. *Cancer* 1991;**67**:2153-58.
14. Zeillo JE, Jovin IS, Huang Y. Hypoxia-inducible factor (HIF)-1 regulatory pathway and its potential for therapeutic intervention in malignancy and ischemia. *Yale J Biol Med* 2007;**80**:51-60.
15. Horree N, van Diest PJ, van der Groep P, et al. Hypoxia and angiogenesis in endometrioid endometrial carcinogenesis. *Cell Oncol* 2007;**29**:219-227.
16. FIGO announcements, stages-1988 Revision (1989) *Gynecol Oncol* 35;125.
17. Patel PS, Rawal GN, Balar DB. Combined use of serum enzyme levels as tumor markers in cervical carcinoma patients. *Tumour Biol* 1994;**15**:45-51.
18. Jean JC, Rich CB, Joyce-Brady M. Hypoxia results in an HIF-1-dependent induction of brain-specific aldolaseC in lung epithelial cells. *Am J Physiol Lung Cell Mol Physiol* 2006;**291**:L950-56.
19. Mhawech-Fauceglia P, Wang D, Kesterson J, et al. Gene expression profiles in stage I uterine serous carcinoma in comparison to grade 3 and grade 1 stage I endometrioid adenocarcinoma. *PLoS One*. 2011 Mar 23;**6**(3):e18066.

- 1
  - 2
  - 3
  - 4
  - 5
  - 6
  - 7
  - 8
  - 9
  - 10
  - 11
  - 12
  - 13
  - 14
  - 15
  - 16
  - 17
  - 18
  - 19
  - 20
  - 21
  - 22
  - 23
  - 24
  - 25
  - 26
  - 27
  - 28
  - 29
  - 30
  - 31
  - 32
  - 33
  - 34
  - 35
  - 36
  - 37
  - 38
  - 39
  - 40
  - 41
  - 42
  - 43
  - 44
  - 45
  - 46
  - 47
  - 48
  - 49
  - 50
  - 51
  - 52
  - 53
  - 54
  - 55
  - 56
  - 57
  - 58
  - 59
  - 60
20. Mhaweche-Fauceglia P, Wang D, Kesterson J, et al. Microarray analysis reveals distinct gene expression profiles among different tumor histology, stage and disease outcomes in endometrial adenocarcinoma. *PLoS One*. 2010;5:e15415.
21. Mhaweche-Fauceglia P, Wang D, Kesterson et al. Aldolase mRNA expression in endometrial cancer and the role of clotrimazole in endometrial cancer cell viability and morphology. *Histopathology*. 2011;59:1015-8.
22. Seeber LMS, Horree N, van der Groep P. et al. Necrosis related HIF-1a expression predicts prognosis in patients with endometrioid endometrial carcinoma. *BMC Cancer* 2010;10:307-3118.

1  
2  
3  
4  
5  
6  
7  
8 **The role of Hypoxic-inducible Factor (HIF1 $\alpha$ ) and Aldolase C Protein in**  
9 **Immunoexpression in Endometrial Carcinogenesis**  
10 **aneer**  
11  
12  
13  
14

15  
16 **Paulette Mhaweck-Fauceglia<sup>1</sup>, Dan Wang<sup>2</sup>, Damanzoopinder Samrao<sup>1</sup>, Teodulo**  
17 **Menesses<sup>1</sup>, Heidi Godoy<sup>3</sup>, Faith Ough<sup>1</sup>, Shashikant lele<sup>3</sup>, Song Liu<sup>2</sup>, Tanja Pejovic<sup>4</sup>**  
18  
19

20  
21  
22  
23  
24 <sup>1</sup> Department of Pathology at University of Southern California, Los Angeles-CA

25  
26 <sup>2</sup>Department of Biostatistics, <sup>3</sup>Department of Gynecologic Oncology at Roswell Park  
27 Cancer Institute, Buffalo NY, <sup>4</sup>Division of Gynecologic Oncology at Oregon Health &  
28 Science University and the Knight Cancer Institute, Portland, Oregon  
29  
30  
31

32  
33  
34  
35  
36  
37  
38  
39  
40 **Corresponding Author:**

41 Paulette Mhaweck-Fauceglia, MD  
42 Department of Pathology  
43 University of Southern California  
44 1200 N. State Street. Room 7A116  
45 Los Angeles, California 90033-5000  
46 E-mail: pfauceglia@hotmail.com  
47  
48  
49  
50

51 1  
52  
53  
54  
55  
56  
57  
58  
59  
60

**Abstract:**

**Objectives:** Hypoxia-inducible factor (HIF1 $\alpha$ ) plays an integral role in response to hypoxia, controlling dozens of target genes including aldolaseC (ALDC), an important enzyme in the glycolytic pathway. It also induces angiogenesis, allowing survival and proliferation of cancer cells. Thus, inhibition of HIF1 $\alpha$  may be an attractive therapeutic option. The aims of our study were to (1) evaluate the expressions of HIF1 $\alpha$  and ALDC in patients with endometrial cancer (EC) and define their association with disease outcome and (2) determine the existence of an association between HIF1 $\alpha$  and ALDC proteins. **Design:** We performed immunohistochemistry using antibodies to ALDC and HIF1 $\alpha$  on paraffin-embedded tissue from 279 patients. The association of ALDC and HIF1 $\alpha$  immunoexpression was evaluated, as well as the association of their expressions with the following clinical parameters; age, histologic subtype, myometrial depth of invasion, lymphovascular invasion, FIGO grade, lymph nodes status, and disease status. **Results:** ALDC and HIF1 $\alpha$  were overexpressed in the vast majority of EC cases (78% and 76% respectively). There was a strong positive association between HIF1 $\alpha$  and ALDC (p=0.0017). There was a significant association between ALDC and depth of myometrial invasion (p=0.0438), and between HIF1 $\alpha$  and tumor grade (p= 0.0231) and tumor subtype (p=0.018). However, there was no association between either ALDC nor HIF1 $\alpha$  and disease status. **Conclusions:** ALDC and HIF1 $\alpha$  play an important role in endometrial carcinogenesis. Their expression by the majority of EC makes inhibition of

HIF1 $\alpha$  a very attractive therapeutic option for treating patients with EC and should be confirmed by future studies.

2

1  
2  
3  
4  
5  
6  
7  
8 **Key words:** HIF1 $\alpha$ ; AldolaseC; Immunohistochemistry; Endometrial cancer; Disease  
9  
10 outcome.

11  
12  
13  
14 **Subject headings:** HIF1 $\alpha$  and aldolaseC in endometrial cancer  
15

16  
17  
18 **Article Summary:**  
19

20 1- Article focus:

- 21
- 22 • HIF1  $\alpha$  and aldolase C expressions in patients with endometrial cancer
  - 23 • HIF1  $\alpha$  and aldolase C interaction in vivo in endometrial cancer.
  - 24 • HIF1  $\alpha$  and aldolaseC value in predicting disease outcome in patients with  
25  
26 endometrial cancer.  
27  
28

29  
30 2- Key messages:

- 31
- 32 • HIF1  $\alpha$  and aldolase C are frequently expressed in endometrial cancer.
  - 33 • There is strong association between HIF1  $\alpha$  and aldolase C in endometrial cancer  
34 and therefore they could play an important role in its pathogenesis.  
35
  - 36 • HIF1  $\alpha$  and aldolase C are associated with poor prognostic factors.  
37
  - 38 • HIF1  $\alpha$  and aldolase C are not independent predictive biomarkers of poor  
39  
40 outcome.  
41  
42

43  
44 3- Strengths:

- 45
- 46 • It is a large study of 279 patients.
  - 47 • It is one of the few in the literature.  
48

49  
50  
51 3  
52  
53  
54  
55  
56  
57  
58  
59  
60

- 1  
2  
3  
4  
5  
6  
7  
8 • It is the first to evaluate the association of HIF1  $\alpha$  and aldolase C in vivo in  
9 endometrial cancer.  
10

11  
12 Limitations:

- 13  
14 • The study did not have a large numbers of type II cancers (serous and clear  
15 cell carcinomas).  
16  
17 • The study did not contain too many cases of late stage tumors (stage III and  
18 IV).  
19  
20  
21  
22  
23  
24  
25  
26  
27  
28  
29  
30  
31  
32  
33  
34  
35  
36  
37  
38  
39  
40  
41  
42  
43  
44  
45  
46  
47  
48  
49  
50  
51  
52  
53  
54  
55  
56  
57  
58  
59  
60



**Study approval:**

This study was approved by the IRB committee and was conducted with maintenance of respect to privacy of all patients throughout.

**Funding statement:**

We, the authors, declare that there was no funding for this study.

**Competing interests:**

We, the authors, declare that there is no competing interest with this study.

**Contribution statement:**

PMF: designed and wrote the study

DW, SL: performed the statistical analysis

DS, HG, TM: reviewed the patients charts

DS, FO: helped in reviewing the manuscript.

SL (Shashikant Lele), TP: ~~mentored and were consulted in designing,~~ Conducting and writing the study

**Introduction:**

Endometrial cancer (EC) is the most common gynecologic malignancy in developed countries. There are approximately 42,000 cases diagnosed annually in the United States, resulting in almost 8,000 deaths, [1]. EC has been classified into two types based on morphology, pathogenesis, behavior and treatment: type I (endometrioid and mucinous carcinomas), and type II (serous and clear cell carcinomas). Type I is usually low-grade and low stage at initial presentation. Type II is usually high grade and advanced stage at initial presentation. The most reliable prognostic factors in predicting disease outcome in EC are tumor grade, tumor stage, tumor subtype, depth of myometrial invasion, and lymph node involvement, [2-4].

One of the most prominent metabolic alterations in cancer cells is an increase in aerobic glycolysis, known as the Warburg effect after its discovery by Otto Warburg in 1920, [5]. This increase in glycolysis, due to a shift in glucose metabolism from oxidative phosphorylation into the aerobic glycolysis pathway, provides the tumor with metabolic and survival advantages, [6-8]. Aldolase, a critical enzyme in the glycolytic pathway, catalyses the reversible conversion of fructose-1,6-biphosphate to glyceraldehyde-3-phosphate and dihydroxyacetone phosphate. Aldolase has three distinct isoenzymes, A, B, and C, which are similar in sequence with 78% identity between A and C and 68% identity between B and C, [9,10]. Originally identified in brain tissue, aldolaseC (ALDC) has been seen to be overexpressed in carcinomas of the lung, kidney, cervix and endometrium, [11-13].

6

1  
2  
3  
4  
5  
6  
7  
8 The Hypoxic-inducible factor (HIF1) gene codes for two subunits,  $\alpha$  and  $\beta$ , and is  
9 usually activated by hypoxic conditions, a microenvironment that commonly  
10 accompanies cancerous tumors. When activated, HIF1 can interact with enzymes and  
11 other transcription factors in order to control vascularization and tissue growth. HIF1 $\alpha$   
12 was recently identified as a potent regulator of ALDC, another mechanism by which it  
13 may promote carcinogenesis, [14]. Thus, attempts to target the HIF1 $\alpha$  pathway in hopes  
14 of suppressing cancer cell proliferation and progression are underway. In the gynecologic  
15 tract, HIF1 $\alpha$  expression increases as the endometrium undergoes changes from normal to  
16 premalignant to endometrioid adenocarcinoma. This is paralleled by increased  
17 angiogenesis in the endometrium suggesting that HIF1 $\alpha$  might be a key regulator in  
18 endometrial carcinogenesis, [15].  
19  
20  
21  
22  
23  
24  
25  
26  
27  
28

29  
30 Though the interaction between HIF1 $\alpha$  and ALDC has been seen in vivo, their  
31 interaction in human samples and in endometrial carcinoma has not yet been described.  
32 Therefore, the aims of this study are (1) to evaluate the expression of HIF1 $\alpha$  and ALDC  
33 proteins in patients with endometrial cancer and to find an association between these two  
34 proteins in this patient sample and (2)- to determine whether either of these two proteins  
35 independently or any combination of their expressions might have an impact on disease  
36 outcome.  
37  
38  
39  
40  
41  
42  
43  
44  
45  
46  
47  
48  
49  
50  
51  
52  
53  
54  
55  
56  
57  
58  
59  
60

7

## Materials and Methods:

**Patient population:** After obtaining IRB approval, the pathology archives were searched for endometrial carcinoma cases from January 2000-December 2010. Data was extracted from clinical charts including patients' age at the time of diagnosis, surgical stage, post-operative therapy, site of recurrence, and cause and time of death. All patients underwent surgical staging with a total hysterectomy and bilateral salpingo-oophorectomy (TAH+BSO), and pelvic washings. Pelvic and para-aortic lymphadenectomy was performed for patients with advanced stage disease and high grade tumors. Patients were treated according to the National Comprehensive Cancer Network (NCCN) guidelines ([www.cancer.gov](http://www.cancer.gov)).

**Histological evaluation:** Tumor grade was assessed using the International Federation of Gynecology and Obstetrics (FIGO) system and by nuclear grading. FIGO grading was determined as follows; tumors with <5% solid areas were grade 1 (G1), tumors with 5%-50% solid areas were grade 2 (G2) and tumors with > 50% solid areas were grade 3 (G3). Tumors nuclear grade was determined by the variation in nuclear size and shape, chromatin distribution and size of the nucleoli. Grade 1 nuclei are oval, mildly enlarged, and have evenly dispersed chromatin. Grade3 nuclei are markedly enlarged and dipleomorphic and have prominent eosinophilic nucleoli. Grade 2 nuclei have features between G1 and G3. Tumor stage was assigned based on 1988 FIGO surgical staging guidelines (FIGO, 1989). [16]. All slides were examined by an expert gynecologic pathologist for confirmation of the histologic type, tumor size, tumor grade, depth of myometrial invasion (MI) and presence of lymphovascular invasion (LVI).

8

1  
2  
3  
4  
5  
6  
7  
8 **Immunohistochemistry:** Four  $\mu\text{m}$  thick sections from 279 cases were deparaffinized  
9 with xylene and washed with ethanol. In addition, 5 sections from normal endometrium  
10 were also included in the study. Sections were cooled for 20 minutes and incubated for 10  
11 minutes with 3%  $\text{H}_2\text{O}_2$  to quench endogenous peroxidase activity. Blocking was  
12 performed using a serum-free protein block, Dakocytomation (Carpenteria, CA), for 30  
13 minutes. The sections were pretreated with an EDTA buffer saline solution, steamed for  
14 20 minutes and then sections were incubated with HIF1 $\alpha$  (monoclonal; 1:1000 dilution;  
15 Novus Biologicals, Littleton, CO-USA) and aldolaseC (monoclonal; 1:250 dilution;  
16 Sigma-Aldrich, St. Louis, MO) for 1 hour at room temperature. The diaminobenzidine  
17 complex was used as a chromogen. Negative control slides omitting the primary antibody  
18 were included in all assays. Breast cancer was used as positive controls for HIF1  $\alpha$  and  
19 ALDC. The extent of immunochemical reactivity was graded based on intensity as  
20 follows: 0 (negative), 1+ (weak), 2+ (moderate), 3+ (strong). For the sake of statistical  
21 analysis, negative and weak stains were grouped as group I (negative) and moderate and  
22 strong as group II (positive).  
23  
24  
25  
26  
27  
28  
29  
30  
31  
32  
33  
34  
35  
36

37 **Statistical Analyses:** The clinical parameters used for modeling were age, tumor size,  
38 histologic subtype, tumor stage, myometrial depth of invasion, LVI, FIGO grade, nuclear  
39 grade, lymph node status, recurrence, recurrence time, survival time and status. To test  
40 the association between aldolaseC/HIF1 $\alpha$  IHC (positive and negative) and the clinical  
41 parameters, Fisher's exact test was performed for categorical parameters and the logistic  
42 regression model was used for continuous ones. Pearson correlation was used to check  
43  
44  
45  
46  
47  
48  
49  
50  
51 9  
52  
53  
54  
55  
56  
57  
58  
59  
60

1  
2  
3  
4  
5  
6  
7  
8 the association of IHC between aldolaseC and HIF1 $\alpha$ . All statistical analysis was  
9  
10 performed using the statistical software package R (<http://www.r-project.org/>).  
11  
12  
13  
14  
15  
16  
17  
18  
19  
20  
21  
22  
23  
24  
25  
26  
27  
28  
29  
30  
31  
32  
33  
34  
35  
36  
37  
38  
39  
40  
41  
42  
43  
44  
45  
46  
47  
48  
49  
50  
51  
52  
53  
54  
55  
56  
57  
58  
59  
60

10

**Results:****Clinical and pathological features:**

279 patients diagnosed with endometrial carcinoma were included in the study.

The age ranged from 29 to 97 years (median age 65 years). The follow-up period ranged from 0 (as one patient was lost for follow-up) to 137.16 months (median 46.32 months).

The clinical and histological features are summarized in Table 1.

| <b>Table 1. Clinical and pathologic features of patients (data in parentheses are percentages).</b> |                     |            |
|-----------------------------------------------------------------------------------------------------|---------------------|------------|
| <b>Characteristics</b>                                                                              |                     |            |
| <b>No. of evaluable patients</b>                                                                    |                     | 279        |
| <b>Age, year</b>                                                                                    |                     |            |
|                                                                                                     | <b>Median</b>       | 65         |
|                                                                                                     | <b>Range</b>        | 29-97      |
| <b>Follow time, months</b>                                                                          |                     |            |
|                                                                                                     | <b>Median</b>       | 46.32      |
|                                                                                                     | <b>Range</b>        | (0-137.16) |
| <b>Stage</b>                                                                                        |                     |            |
|                                                                                                     | <b>I</b>            | 181(64.87) |
|                                                                                                     | <b>II</b>           | 35(12.54)  |
|                                                                                                     | <b>III</b>          | 43(15.41)  |
|                                                                                                     | <b>IV</b>           | 20(7.17)   |
| <b>Subtype</b>                                                                                      |                     |            |
|                                                                                                     | <b>Endometrioid</b> | 202(72.4)  |
|                                                                                                     | <b>CCC+serous</b>   | 77(27.6)   |
| <b>Grade(FIGO)</b>                                                                                  |                     |            |
|                                                                                                     | <b>1</b>            | 119(42.65) |
|                                                                                                     | <b>2</b>            | 53(19)     |
|                                                                                                     | <b>3</b>            | 107(38.35) |
| <b>Grade(Nuclear)</b>                                                                               |                     |            |
|                                                                                                     | <b>1</b>            | 93(33.33)  |
|                                                                                                     | <b>2</b>            | 75(26.88)  |
|                                                                                                     | <b>3</b>            | 111(39.78) |
| <b>Tumor size, cm</b>                                                                               |                     |            |
|                                                                                                     | <b>&lt;=2</b>       | 62(22)     |
|                                                                                                     | <b>&gt;2</b>        | 217(78)    |
| <b>Depth of invasion</b>                                                                            |                     |            |
|                                                                                                     | <b>Median</b>       | 28         |
|                                                                                                     | <b>Range</b>        | 0-100      |
| <b>LVI</b>                                                                                          |                     |            |
|                                                                                                     | <b>N</b>            | 202(72.4)  |

11

|                   |                                          |            |
|-------------------|------------------------------------------|------------|
|                   | Y                                        | 77(27.6)   |
| Lymph node status | Positive                                 | 50(17.92)  |
|                   | Negative                                 | 135(48.39) |
|                   | Unknown                                  | 94(33.69)  |
| Recurrence        | N                                        | 215(77.06) |
|                   | Y                                        | 47(16.85)  |
|                   | Persistent                               | 12(4.3)    |
|                   | Progression                              | 4(1.43)    |
|                   | Unknown                                  | 1(0.36)    |
| Status            | Alive with no evidence of disease (ANED) | 188(67.38) |
|                   | Alive with evidence of disease (AWED)    | 22(7.89)   |
|                   | Dead of disease (DOD)                    | 38(13.62)  |
|                   | Dead with no evidence of disease (DNED)  | 22(7.89)   |
|                   | dead unknown cause                       | 1(0.36)    |
|                   | Dead with evidence of disease(DWED)      | 7(2.51)    |
|                   | lost for FU                              | 1(0.36)    |

#### AldolaseC and HIF1 $\alpha$ immunoexpressions:

~~The stain intensity was diffuse and homogenous throughout the tumor.~~ The staining patterns were nuclear for HIF1 $\alpha$  and cytoplasmic for ALDC. The 5 cases of normal endometrium all came from patients who underwent a hysterectomy for benign reasons, such as fibroids, and were weakly positive for ALDC and negative for HIF1 $\alpha$  (Fig 1A, 1B). There was a strong positive association between ALDC and HIF1 $\alpha$  proteins (p=0.0017) in endometrial cancer. The results of the association of ALDC and the clinical-pathological variables are shown in Table 2. 59/279 (22%) of cases were negative for ALDC protein and 220/279 (78%) were positive (Fig 2A, 2B). ALDC was only associated with depth of myometrial invasion (p=0.0438), leading to the conclusion that tumors that invade deeper into the myometrium are more likely to overexpress ALDC.

12



Table 2. Association of Aldolase C IHC with Clinicopathologic Variables.

| Variables                    | Negative<br>(n = 59) | Positive<br>(n = 220) | P value |
|------------------------------|----------------------|-----------------------|---------|
| Age (median)                 | 69                   | 65                    | 0.4*    |
| Myometrial invasion (median) | 21                   | 31.5                  | 0.0438  |
| Stage                        |                      |                       |         |
| I                            | 41(69.49)            | 140(63.64)            | 0.7656  |
| II                           | 8(13.56)             | 27(12.27)             |         |
| III                          | 7(11.86)             | 36(16.36)             |         |
| IV                           | 3(5.08)              | 17(7.73)              |         |
| Tumor Size                   |                      |                       |         |
| ≤2 cm                        | 15(25.42)            | 47(21.36)             | 0.4866^ |
| >2 cm                        | 44(74.58)            | 173(78.64)            |         |
| LVI                          |                      |                       |         |
| N                            | 46(77.97)            | 156(70.91)            | 0.3273  |
| Y                            | 13(22.03)            | 64(29.09)             |         |
| Grade_FIGO                   |                      |                       |         |
| 1                            | 24(40.68)            | 95(43.18)             | 0.9266  |
| 2                            | 11(18.64)            | 42(19.09)             |         |
| 3                            | 24(40.68)            | 83(37.73)             |         |
| Grade_nuclear                |                      |                       |         |
| 1                            | 15(25.42)            | 78(35.45)             | 0.3096  |
| 2                            | 19(32.2)             | 56(25.45)             |         |
| 3                            | 25(42.37)            | 86(39.09)             |         |
| Lymph node status            |                      |                       |         |
| Positive                     | 6(16.22)             | 44(29.73)             | 0.1461  |
| Negative                     | 31(83.78)            | 104(70.27)            |         |
| Subtype                      |                      |                       |         |
| CCC+Serous                   | 17(28.81)            | 60(27.27)             | 0.87    |
| Endometrioid                 | 42(71.19)            | 160(72.73)            |         |
| Recurrence                   |                      |                       |         |
| N                            | 45(81.82)            | 170(82.13)            | 1       |
| Y                            | 10(18.18)            | 37(17.87)             |         |
| Status                       |                      |                       |         |
| ANED                         | 41(69.49)            | 147(66.82)            | 0.7561  |
| Others                       | 18(30.51)            | 73(33.18)             |         |

\*Pvalue calculated by logistic linear regression

^Pvalue calculated by Fisher exact test

The results of the association between HIF1 $\alpha$  and the clinical-pathological variables are summarized in **Table 3**. 66/279 (24%) of cases did not express HIF1 $\alpha$  and 213/279 (76%) did (**Fig 3A, 3B**). There was an association between HIF1 $\alpha$  and histologic subtype and tumor grade (p=0.018 and 0.0368 respectively). This lead us to the conclusion that endometrioid adenocarcinomas are more likely to express HIF1 $\alpha$  than clear cell and serous adenocarcinomas. In addition, high grade tumors, G2 and G3, are more likely to express HIF1 $\alpha$  than low grade tumors (G1).

**Table 3. Association of IHF1 $\alpha$  IHC with Clinicopathologic Variables.**

| Variables                    | Negative<br>(n = 66) | Positive<br>(n = 213) | P value |
|------------------------------|----------------------|-----------------------|---------|
| Age (median)                 | 65                   | 65                    | 0.3571* |
| Myometrial invasion (median) | 40                   | 25                    | 0.0646^ |
| Stage                        |                      |                       |         |
| I                            | 39(59.09)            | 142(66.67)            | 0.6376  |
| II                           | 10(15.15)            | 25(11.74)             |         |
| III                          | 11(16.67)            | 32(15.02)             |         |
| IV                           | 6(9.09)              | 14(6.57)              |         |
| Tumor Size                   |                      |                       |         |
| <=2 cm                       | 15(22.73)            | 47(22.07)             | 1       |
| >2 cm                        | 51(77.27)            | 166(77.93)            |         |
| LVI                          |                      |                       |         |
| N                            | 46(69.7)             | 156(73.24)            | 0.6367  |
| Y                            | 20(30.3)             | 57(26.76)             |         |
| Grade_FIGO                   |                      |                       |         |
| 1                            | 22(33.33)            | 97(45.54)             | 0.0231  |
| 2                            | 9(13.64)             | 44(20.66)             |         |
| 3                            | 35(53.03)            | 72(33.8)              |         |
| Grade_nuclear                |                      |                       |         |
| 1                            | 19(28.79)            | 74(34.74)             | 0.0368  |
| 2                            | 12(18.18)            | 63(29.58)             |         |
| 3                            | 35(53.03)            | 76(35.68)             |         |
| Lymph node status            |                      |                       |         |
| Positive                     | 14(26.92)            | 36(27.07)             | 1       |

14

|                   |                     |           |            |              |
|-------------------|---------------------|-----------|------------|--------------|
|                   | <b>Negative</b>     | 38(73.08) | 97(72.93)  |              |
| <b>Subtype</b>    | <b>CCC+Serous</b>   | 26(39.39) | 51(23.94)  |              |
|                   | <b>Endometrioid</b> | 40(60.61) | 162(76.06) | <b>0.018</b> |
| <b>Recurrence</b> | <b>N</b>            | 48(81.36) | 167(82.27) |              |
|                   | <b>Y</b>            | 11(18.64) | 36(17.73)  | 0.849        |
| <b>Status</b>     | <b>ANED</b>         | 40(60.61) | 148(69.48) |              |
|                   | <b>Others</b>       | 26(39.39) | 65(30.52)  | 0.1805       |

\*Pvalue calculated by logistic linear regression

^Pvalue calculated by Fisher exact test

Finally, neither ALDC nor HIF1 $\alpha$  proteins individually, or any combination of their expressions, (ALDC+/HIF1 $\alpha$ -), (ALDC+/HIF1 $\alpha$ +), (ALDC-/HIF1 $\alpha$ +), (ALDC-/HIF1 $\alpha$ -), had an impact on disease outcome such as recurrence, progression or death of disease.

**Discussion:**

HIF1 $\alpha$  is a transcription factor and it is a major regulator of oxygen homeostasis within cells, [14]. It plays an important role in tumorigenesis through its enhancement of angiogenesis via regulation of vascular endothelial growth factor (VEGF) transcription which promotes endothelial cell migration toward a hypoxic area. In addition, in hypoxic conditions, HIF1 $\alpha$  regulates metabolism by shifting the production of ATP via oxidative phosphorylation to anaerobic metabolism by stimulation of a variety of glycolytic enzymes, including ALDC, [17,18]. Even though this relation between HIF1 $\alpha$  and ALDC is well established in vitro and animal models, their association in human cancer tissues, namely endometrial cancer, is still widely unexplored. Our main goal was to evaluate the expression of ALDC and HIF1 $\alpha$  in a large series of cases of endometrial cancer. We found that ALDC and HIF1 $\alpha$  were both expressed in the majority of endometrial cancer cases and they were negative in normal endometrium. In addition, a strong positive association between HIF1 $\alpha$  and ALDC was seen in these cases.

Previously, using cDNA microarray, we showed that one of the genes that is upregulated in uterine serous carcinoma (USC) in comparison to endometrioid adenocarcinoma (EAC) is *aldolaseC*, [19, 20]. Furthermore, qRT-PCR showed that ALDC mRNA level was overexpressed in endometrial carcinomas in comparison to normal endometrium, but there was no association between ALDC-mRNA level and the endometrial cancer subtypes-[21]. Similarly, in this

1  
2  
3  
4  
5  
6  
7  
8 study, we found that ALDC was not associated with tumor subtype. However, it  
9 was associated with one of the most reliable pathological prognostic factors of  
10 poor outcome, depth of myometrial invasion. In addition, we found that  
11 overexpression of HIF1 $\alpha$  is associated with high tumor grade, another major  
12 prognostic factor of poor outcome in patients with EC. This further confirms that  
13 ALDC and HIF1 $\alpha$  overexpression may be related to tumor aggressiveness,  
14 [15,22]. All the above data leads us to suggest that these two proteins may be key  
15 regulators in endometrial carcinogenesis.  
16  
17  
18  
19  
20  
21  
22

23 Recently, with clearer understanding of the function of HIF1 $\alpha$  and its  
24 pathway, efforts directed at manipulation of this complex in order to decrease  
25 cellular HIF1 $\alpha$  levels in tumor cells have been undertaken. Thus, modulation of  
26 HIF1 $\alpha$  and its pathway promises to have a significant impact on cancer and it  
27 seems to be an attractive therapeutic option for patients with endometrial cancer.  
28  
29  
30  
31  
32

33 In summary, ALDC and HIF1 $\alpha$  seem to play a role in the tumorigenesis of  
34 endometrial cancer and their expression may be an indication of tumor  
35 aggressiveness. -and we suggest that prospectively will be validated in future  
36 studies.  
37  
38  
39  
40  
41  
42  
43  
44  
45  
46  
47  
48  
49  
50  
51  
52  
53  
54  
55  
56  
57  
58  
59  
60

Formatted: Indent: Left: 0.5", First line: 0"

1  
2  
3  
4  
5  
6  
7  
8 **Legends:**  
9

10 **Fig 1A:** ALDC is negative in normal endometrium (x 40) and **Fig 1B.** HIF-1 $\alpha$  is  
11 negative/weakly positive in normal endometrium (x40).  
12

13  
14  
15  
16 **Fig 2A:** ALDC in endometrioid adenocarcinoma and in serous adenocarcinoma (**Fig**  
17 **2B).** The staining is strong and cytoplasmic (x40).  
18  
19

20  
21  
22 **Fig 3A:** HIF-1 $\alpha$  in endometrioid adenocarcinoma and in serous adenocarcinoma (**Fig**  
23 **3B).** The staining is strong and it has a nuclear pattern (x40).  
24  
25  
26  
27  
28  
29  
30  
31  
32  
33  
34  
35  
36  
37  
38  
39  
40  
41  
42  
43  
44  
45  
46  
47  
48  
49  
50  
51  
52  
53  
54  
55  
56  
57  
58  
59  
60

**References:**

1. Jemal A, Siegel R, Ward E, et al. Cancer statistics, 2009. *CA Cancer J Clin* 2009;**59**:225-49.
2. Part J. Prognostic parameters of endometrial carcinoma. *Hum Pathol* 2004;**35**:649-662.
3. Kitchener HC, Trimble EL. Endometrial cancer state of the science meeting. *Int J Gynecol Cancer* 2009;**19**:134-140.
4. Naumann RW. Uterine papillary serous carcinoma: state of the state. *Curr Oncol Rep* 2008;**10**:505-11.
5. Warburg O. On the origin of cancer cells. *Science* 1956;**123**:309-314.
6. Beckner ME, Stracke ML, Liotta LA, et al. Glycolysis as primary energy source in tumor chemotaxis. *J Natl Cancer Inst* 1990;**82**:1836-40.
7. Greiner EF, Guppy M, Brand K. Glucose is essential for proliferation and the glycolytic enzyme induction that provokes a transition to glycolytic energy production. *J Biol Chem* 1994;**269**:31484-490.
8. Saw RJ. Glucose metabolism and cancer. *Curr Opin Cell Biol* 2006;**18**:598-08.
9. Kurganov BI, Sugrobova NP, Mil'man LS. Supramolecular organization of glycolytic enzymes. *J Theor Biol* 1985;**116**:509-526.
10. Ronai Z. Glycolytic enzymes as DNA binding proteins. *Int J Biochem* 1993;**25**:1073-1076.
11. Marshall MJ, Goldberg DM, Neal FE, et al. Enzymes of glucose metabolism in carcinoma of the cervix and endometrium of the human uterus. *Br J Cancer* 1978;**37**:990-01.
12. Takashi M, Haimoto H, Koshikawa T, et al. Expression of aldolaseC isozyme in renal cell carcinoma. *Am J Clin Pathol* 1990;**93**:631-36.
13. Ojika T, Imaizumi M, Abe T, et al. Immunochemical and immunohistochemical studies on three aldolase isozymes in human lung cancer. *Cancer* 1991;**67**:2153-58.
14. Zeillo JE, Jovin IS, Huang Y. Hypoxia-inducible factor (HIF)-1 regulatory pathway and its potential for therapeutic intervention in malignancy and ischemia. *Yale J Biol Med* 2007;**80**:51-60.
15. Horree N, van Diest PJ, van der Groep P, et al. Hypoxia and angiogenesis in endometrioid endometrial carcinogenesis. *Cell Oncol* 2007;**29**:219-227.
16. FIGO announcements, stages-1988 Revision (1989) *Gynecol Oncol* 35:125.
17. Patel PS, Rawal GN, Balar DB. Combined use of serum enzyme levels as tumor markers in cervical carcinoma patients. *Tumour Biol* 1994;**15**:45-51.
18. Jean JC, Rich CB, Joyce-Brady M. Hypoxia results in an HIF-1-dependent induction of brain-specific aldolaseC in lung epithelial cells. *Am J Physiol Lung Cell Mol Physiol* 2006;**291**:L950-56.
19. Mhaweche-Fauceglia P, Wang D, Kesterson J, et al. Gene expression profiles in stage I uterine serous carcinoma in comparison to grade 3 and grade 1 stage I endometrioid adenocarcinoma. *PLoS One*. 2011 Mar 23;**6**(3):e18066.

- 1
  - 2
  - 3
  - 4
  - 5
  - 6
  - 7
  - 8
  - 9
  - 10
  - 11
  - 12
  - 13
  - 14
  - 15
  - 16
  - 17
  - 18
  - 19
  - 20
  - 21
  - 22
  - 23
  - 24
  - 25
  - 26
  - 27
  - 28
  - 29
  - 30
  - 31
  - 32
  - 33
  - 34
  - 35
  - 36
  - 37
  - 38
  - 39
  - 40
  - 41
  - 42
  - 43
  - 44
  - 45
  - 46
  - 47
  - 48
  - 49
  - 50
  - 51
  - 52
  - 53
  - 54
  - 55
  - 56
  - 57
  - 58
  - 59
  - 60
20. Mhaweche-Fauceglia P, Wang D, Kesterson J, et al. Microarray analysis reveals distinct gene expression profiles among different tumor histology, stage and disease outcomes in endometrial adenocarcinoma. *PLoS One*. 2010;5:e15415.
21. Mhaweche-Fauceglia P, Wang D, Kesterson et al. Aldolase mRNA expression in endometrial cancer and the role of clotrimazole in endometrial cancer cell viability and morphology. *Histopathology*. 2011;59:1015-8.
22. Seeber LMS, Horree N, van der Groep P. et al. Necrosis related HIF-1a expression predicts prognosis in patients with endometrioid endometrial carcinoma. *BMC Cancer* 2010;10:307-3118.



1  
2  
3  
4  
5  
6  
7  
8  
9  
10  
11  
12  
13  
14  
15  
16  
17  
18  
19  
20  
21  
22  
23  
24  
25  
26  
27  
28  
29  
30  
31  
32  
33  
34  
35  
36  
37  
38  
39  
40  
41  
42  
43  
44  
45  
46  
47  
48  
49  
50  
51  
52  
53  
54  
55  
56  
57  
58  
59  
60

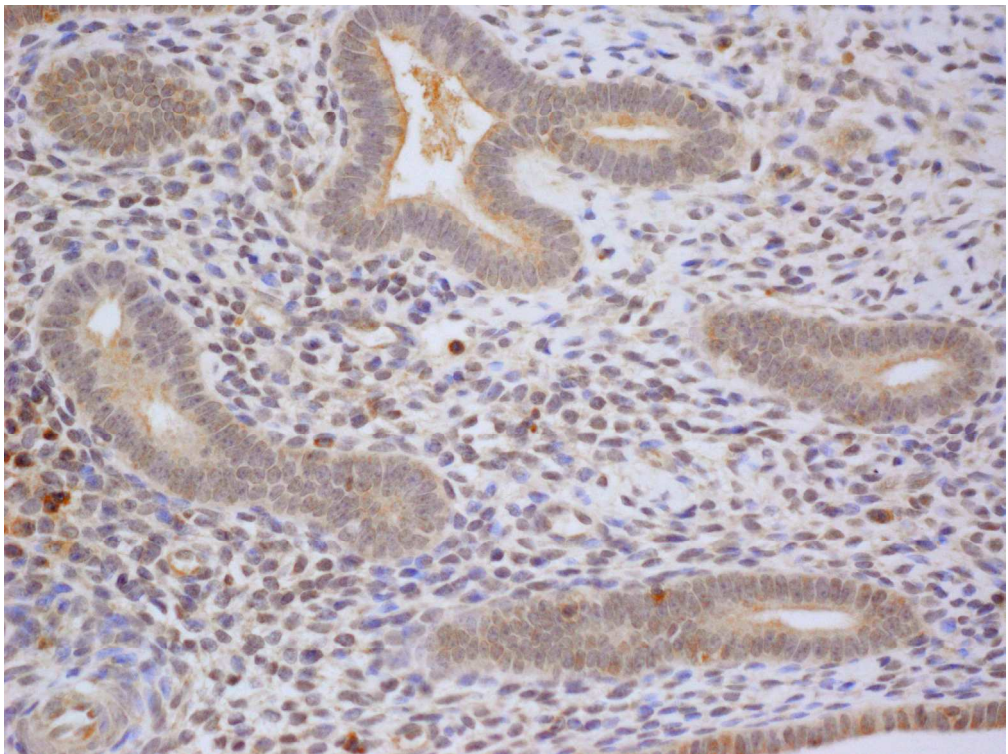

903x677mm (72 x 72 DPI)

ew only

1  
2  
3  
4  
5  
6  
7  
8  
9  
10  
11  
12  
13  
14  
15  
16  
17  
18  
19  
20  
21  
22  
23  
24  
25  
26  
27  
28  
29  
30  
31  
32  
33  
34  
35  
36  
37  
38  
39  
40  
41  
42  
43  
44  
45  
46  
47  
48  
49  
50  
51  
52  
53  
54  
55  
56  
57  
58  
59  
60

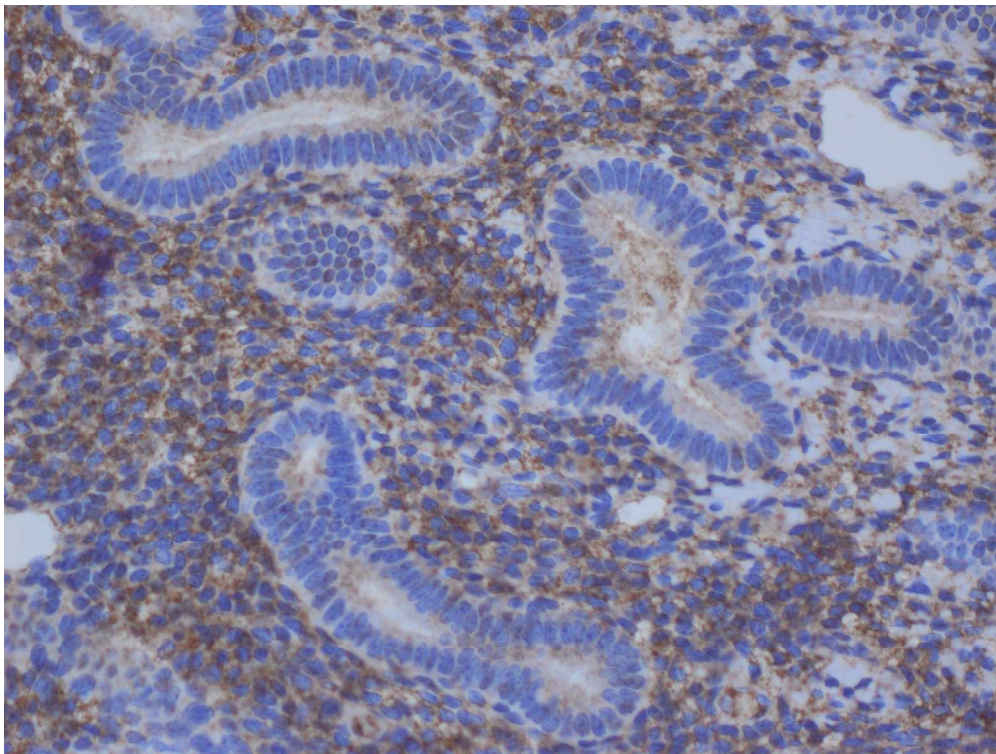

903x677mm (72 x 72 DPI)

ew only

1  
2  
3  
4  
5  
6  
7  
8  
9  
10  
11  
12  
13  
14  
15  
16  
17  
18  
19  
20  
21  
22  
23  
24  
25  
26  
27  
28  
29  
30  
31  
32  
33  
34  
35  
36  
37  
38  
39  
40  
41  
42  
43  
44  
45  
46  
47  
48  
49  
50  
51  
52  
53  
54  
55  
56  
57  
58  
59  
60

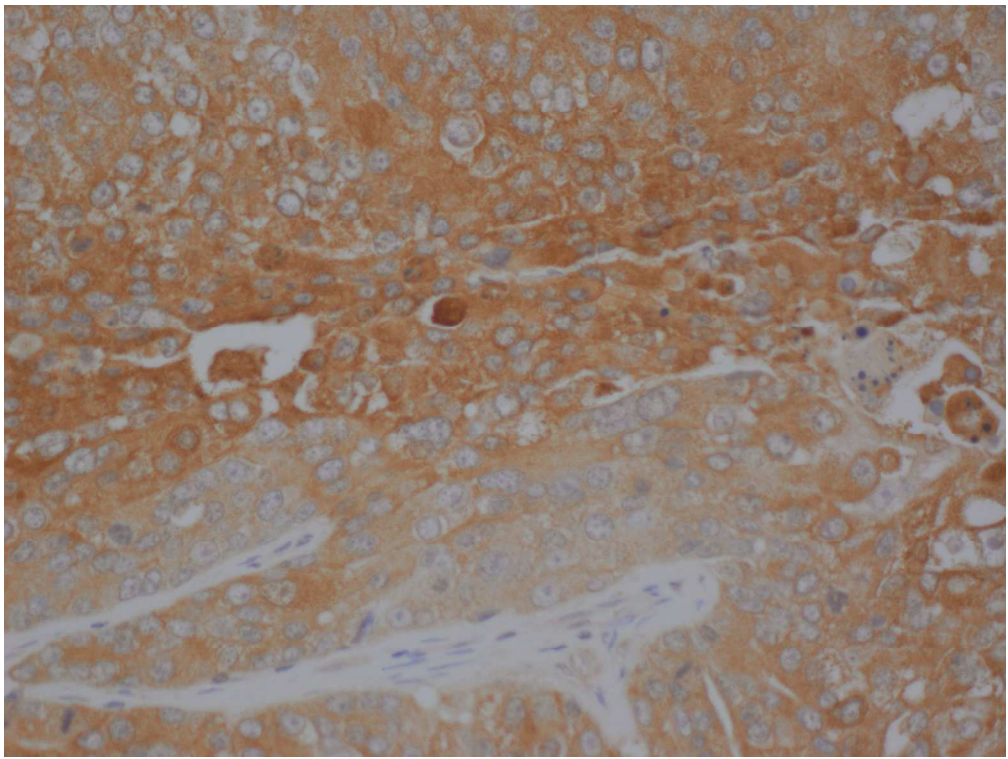

903x677mm (72 x 72 DPI)

ew only



1  
2  
3  
4  
5  
6  
7  
8  
9  
10  
11  
12  
13  
14  
15  
16  
17  
18  
19  
20  
21  
22  
23  
24  
25  
26  
27  
28  
29  
30  
31  
32  
33  
34  
35  
36  
37  
38  
39  
40  
41  
42  
43  
44  
45  
46  
47  
48  
49  
50  
51  
52  
53  
54  
55  
56  
57  
58  
59  
60

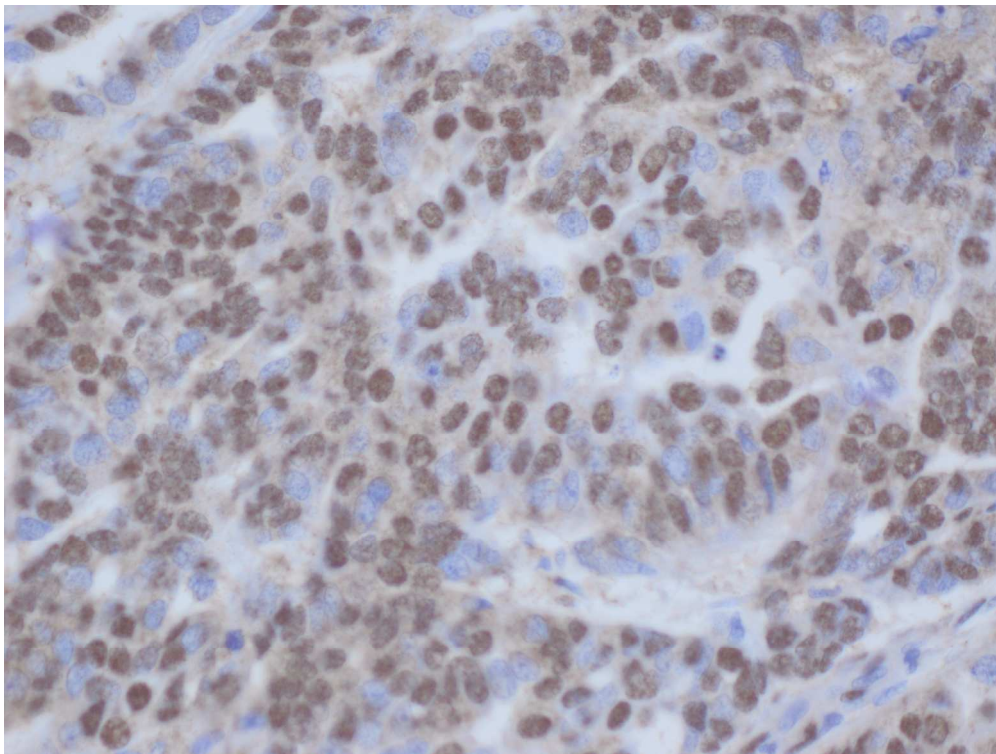

903x677mm (72 x 72 DPI)

ew only

1  
2  
3  
4  
5  
6  
7  
8  
9  
10  
11  
12  
13  
14  
15  
16  
17  
18  
19  
20  
21  
22  
23  
24  
25  
26  
27  
28  
29  
30  
31  
32  
33  
34  
35  
36  
37  
38  
39  
40  
41  
42  
43  
44  
45  
46  
47  
48  
49  
50  
51  
52  
53  
54  
55  
56  
57  
58  
59  
60

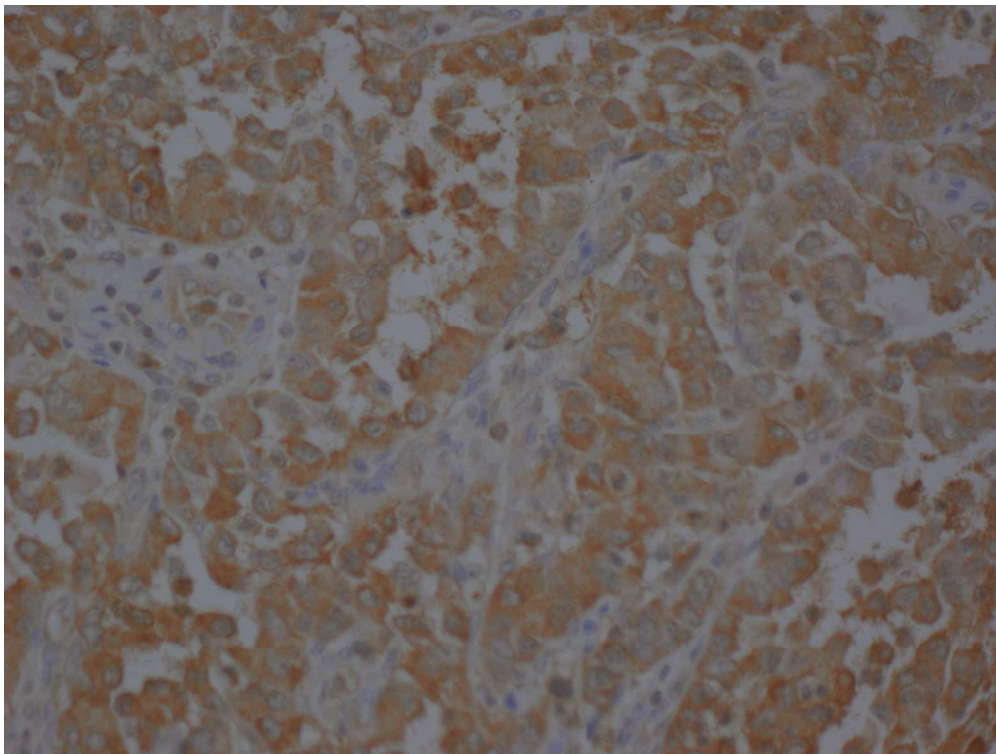

903x677mm (72 x 72 DPI)

ew only

1  
2  
3  
4  
5  
6  
7  
8  
9  
10  
11  
12  
13  
14  
15  
16  
17  
18  
19  
20  
21  
22  
23  
24  
25  
26  
27  
28  
29  
30  
31  
32  
33  
34  
35  
36  
37  
38  
39  
40  
41  
42  
43  
44  
45  
46  
47  
48  
49  
50  
51  
52  
53  
54  
55  
56  
57  
58  
59  
60

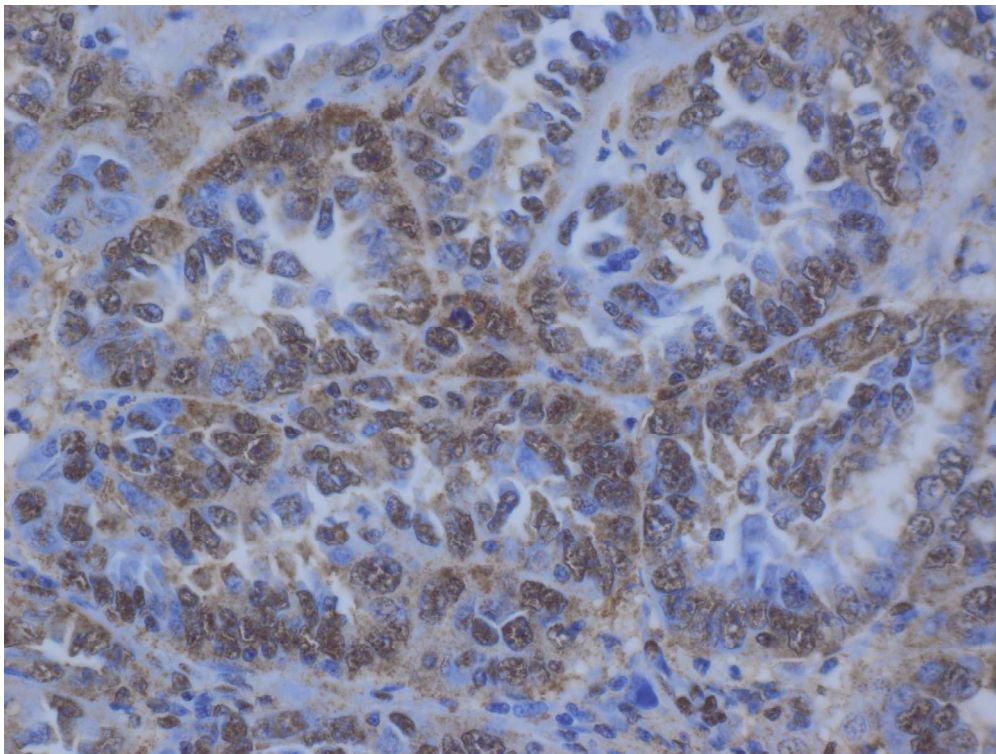

903x677mm (72 x 72 DPI)

ew only
